# Supplementary material
Source: MDPI journal article supplement (https://www.mdpi.com/2311-5521/5/2/48)
Supplement: s1 [file s1]

# A Swing of Beauty:

## *Pendulums, Fluids, Forces, and Computers!*

**Michael Mongelli<sup>1</sup>**

TCNJ Computer Science Major

**Nicholas A. Battista<sup>2</sup>**

[battistn@tcnj.edu](mailto:battistn@tcnj.edu)

 [@mostnerdy](https://twitter.com/mostnerdy)

<sup>1</sup>Dept. of Computer Science,

<sup>2</sup>Dept. of Math and Statistics,  
School of Science  
The College of New Jersey

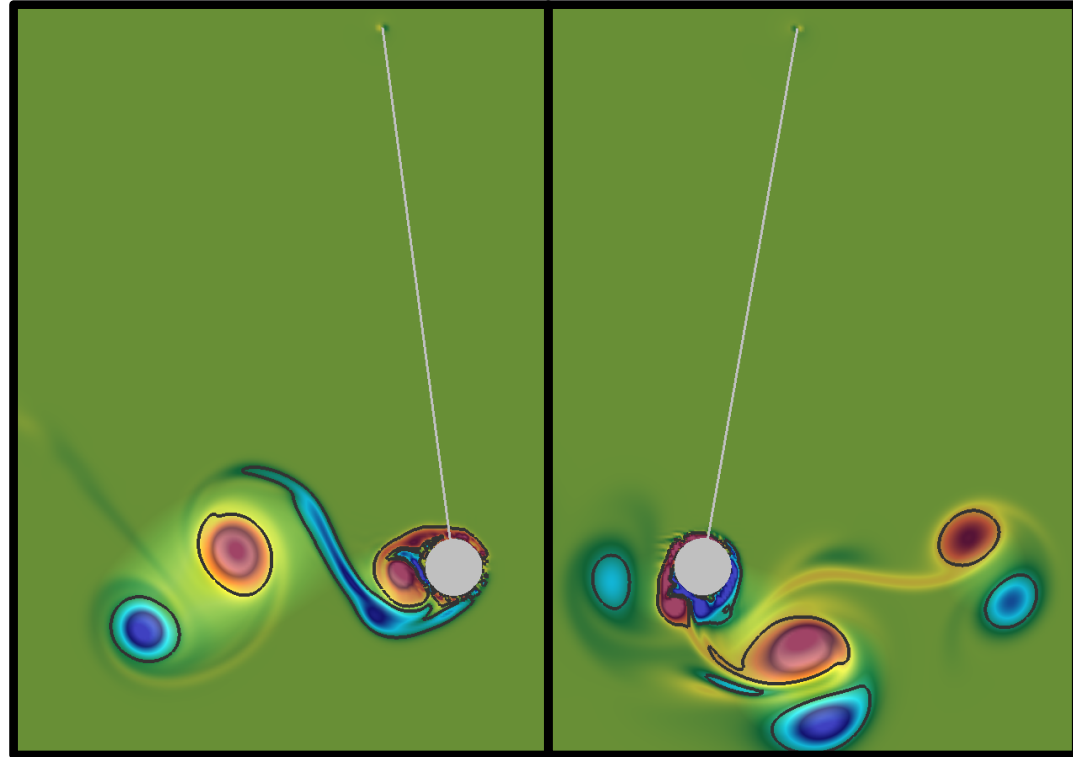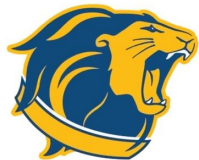

# Outline:

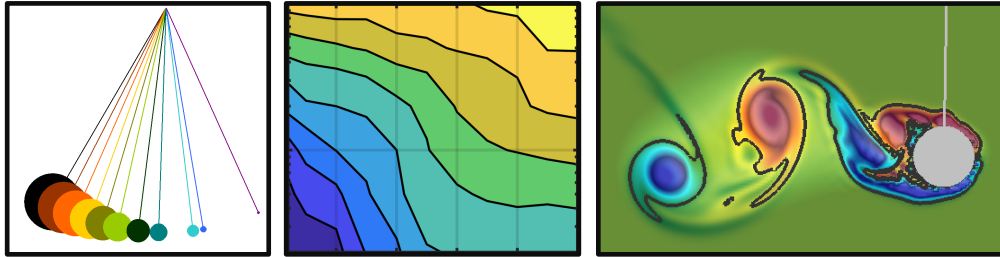

- **A pendulum tale...**
  - **History & Reduced-Order Model**
  - Fluid-Structure Interaction (FSI) Model
  - Comparison and Validation

# A Brief History...

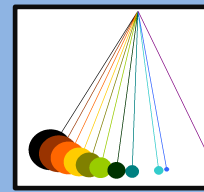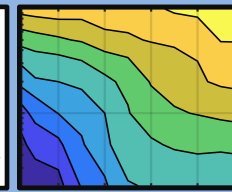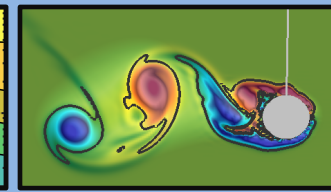

## Pendulums have been studied for millennia...

### nature

News | Published: 12 April 1888

### *Pendulum Seismometers*

JOHN MILNE

*Nature* 37, 570–571(1888) | [Cite this article](#)

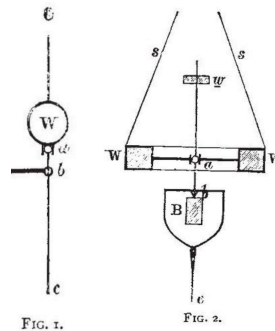

*Ideas dating back thousands of years!*

### Antiquity

Volume 92, Issue 361 February 2018, pp. 217–232

### Experimental stone-cutting with the Mycenaean pendulum saw

Nicholas G. Blackwell <sup>(a1)</sup>

*How ancient civilizations may have built palaces thousands of years ago!*

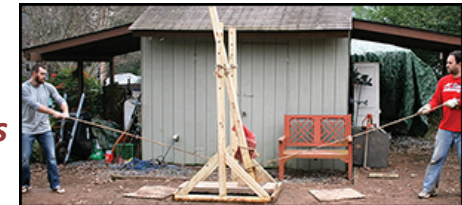

[J Extra Corpor Technol.](#) 2003 Sep;35(3):172-83.

### History of extracorporeal circulation: the conceptional and developmental period.

[Boettcher W<sup>1</sup>](#), [Merkle F](#), [Weitkemper HH](#).

*Pendulum Clocks dating back to the 1660s and continual improvements thereafter!*

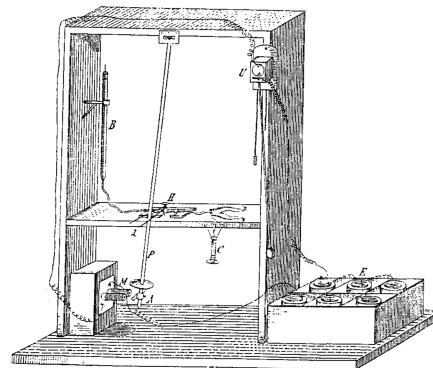

**Figure 8.** The “electrical pendular cock” developed by Hamel (1889). A pendulum (P), activated by a magnet (M), opens and closes a stop-cock (H), resulting in intermittent perfusion pressure.

### The Pit and the Pendulum Audiobook

Author: **Edgar Allan Poe**

Narrator: **Chris Lutkin**

Publisher: **Dreamscape**

*...and even in pop culture!*

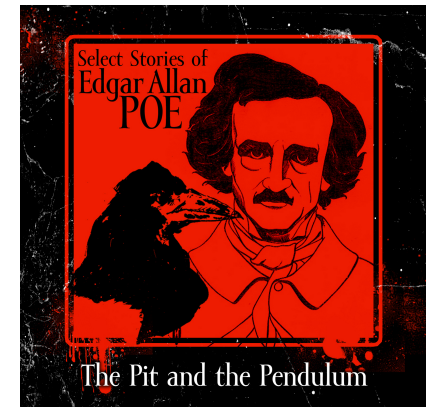

# Even recently...



## New complex dynamics of pendulums are continually being discovered...

Open . Published Online: 01 October 2007 Accepted: June 2007

### Enhanced upswing in immersed collisions of tethered spheres

Physics of Fluids **19**, 101701 (2007); <https://doi.org/10.1063/1.2771657>

Hui-Chi Hsu and Hervé Capart

Full . Published Online: 09 February 2007 Accepted: September 2006

### A pendulum experiment on added mass and the principle of equivalence

American Journal of Physics **75**, 226 (2007); <https://doi.org/10.1119/1.2360993>

Douglas Neill, Dean Livelybrooks and Russell J. Donnelly

### PHYSICAL REVIEW E

*covering statistical, nonlinear, biological, and soft matter physics*

### Oscillating pendulum decay by emission of vortex rings

Diogo Bolster, Robert E. Hershberger, and Russell J. Donnelly  
Phys. Rev. E **81**, 046317 – Published 26 April 2010

Published Online: 29 April 2013 Accepted: March 2013

### A pendulum in a flowing soap film

Physics of Fluids **25**, 041702 (2013); <https://doi.org/10.1063/1.4800057>

M. M. Bandi<sup>1, a)</sup>, A. Concha<sup>1, b)</sup>, R. Wood<sup>1</sup>, and L. Mahadevan<sup>1,2</sup>

### European Journal of Physics

PAPER

### Dynamics of damped oscillations: physical pendulum

G D Quiroga<sup>1,2,3</sup> and P A Ospina-Henao<sup>1,2</sup>

Published 23 October 2017 • © 2017 European Physical Society

[European Journal of Physics, Volume 38, Number 6](#)

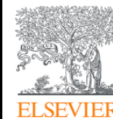

### Journal of Fluids and Structures

Volume 56, July 2015, Pages 124-133

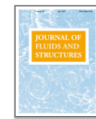

### Galloping instability and control of a rigid pendulum in a flowing soap film

Alessandro Orchini<sup>a, 1, ✉</sup>, Hamid Kellay<sup>b</sup>, Andrea Mazzino<sup>c, d</sup>

### Journal of Fluid Mechanics

Volume 862 10 March 2019, pp. 348-363

### Dynamics of heavy and buoyant underwater pendulums

Varghese Mathai<sup>id (a1) (a2)</sup>, Laura A. W. M. Loeffen<sup>(a2)</sup>, Timothy T. K. Chan<sup>(a2) (a3)</sup> and Sander Wildeman<sup>(a2) (a4)</sup>

DOI: <https://doi.org/10.1017/jfm.2018.867> Published online by Cambridge University Press: 16 January 2019

**\*Not a complete list.**



# Even recently...



## All of these studies have one thing in common...

Open . Published Online: 01 October 2007 Accepted: June 2007

### Enhanced upswing in immersed collisions of tethered spheres

Physics of Fluids 19, 101701 (2007); <https://doi.org/10.1063/1.2771657>

Hui-Chi Hsu and Hervé Capart

Full . Published Online: 09 February 2007 Accepted: September 2006

### A pendulum experiment on added mass and the principle of equivalence

American Journal of Physics 75, 226 (2007); <https://doi.org/10.1119/1.2360993>

Douglas Neill, Dean Livelybrooks and Russell J. Donnelly

### PHYSICAL REVIEW E

covering statistical, nonlinear, biological, and soft matter physics

### Oscillating pendulum decay by emission of vortex rings

Diogo Bolster, Robert E. Hershberger, and Russell J. Donnelly  
Phys. Rev. E 81, 046317 – Published 26 April 2010

Published Online: 29 April 2013 Accepted: March 2013

### A pendulum in a flowing soap film

Physics of Fluids 25, 041702 (2013); <https://doi.org/10.1063/1.4800057>

M. M. Bandi<sup>1, a)</sup>, A. Concha<sup>1, b)</sup>, R. Wood<sup>1</sup>, and L. Mahadevan<sup>1,2</sup>

European Journal of Physics

PAPER

### Dynamics of damped oscillations: physical pendulum

G D Quiroga<sup>1,2,3</sup> and P A Ospina-Henao<sup>1,2</sup>

Published 23 October 2017 • © 2017 European Physical Society

European Journal of Physics, Volume 38, Number 6

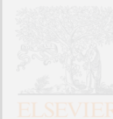

Journal of Fluids and Structures

Volume 56, July 2015, Pages 124-133

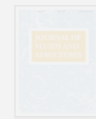

### Galopping instability and control of a rigid pendulum in a flowing soap film

Alessandro Orchini<sup>a, 1, 2</sup>, Hamid Kellay<sup>b</sup>, Andrea Mazzino<sup>c, d</sup>

### Journal of Fluid Mechanics

Volume 862 10 March 2019, pp. 348-363

### Dynamics of heavy and buoyant underwater pendulums

Varghese Mathai<sup>(a1) (a2)</sup>, Laura A. W. M. Loeffen<sup>(a2)</sup>, Timothy T. K. Chan<sup>(a2) (a3)</sup> and Sander Wildeman<sup>(a2) (a4)</sup>

DOI: <https://doi.org/10.1017/jfm.2018.867> Published online by Cambridge University Press: 16 January 2019

\*Not a complete list.

# Even recently...



## All of these studies have one thing in common...

They all study the *interactions* between the pendulum and the fluid environment it is immersed within!

Open . Published Online: 01 October 2007 Accepted: June 2007

### Enhanced upswing in immersed collisions of tethered spheres

Physics of Fluids 19, 101701 (2007); <https://doi.org/10.1063/1.2771657>

Hui-Chi Hsu and Hervé Capart

Full . Published Online: 09 Feb

### A pendulum principle of e

American Journal of Physic

Douglas Neill Dean Livelybro

### PHYSICAL REVIEW E

covering statistical, nonlinear, biological, and soft matter physics

### Oscillating pendulum decay by emission of vortex rings

Diogo Bolster, Robert E. Hershberger, and Russell J. Donnelly  
Phys. Rev. E 81, 046317 – Published 26 April 2010

Published Online: 29 April 2013 Accepted: March 2013

### A pendulum in a flowing soap film

Physics of Fluids 25, 041702 (2013); <https://doi.org/10.1063/1.4800057>

M. M. Bandi<sup>1, a)</sup>, A. Concha<sup>1, b)</sup>, R. Wood<sup>1</sup>, and L. Mahadevan<sup>1,2</sup>

European Journal of Physics

PAPER

### Dynamics of damped oscillations: physical pendulum

G D Quiroga<sup>1,2,3</sup> and P A Ospina-Henao<sup>1,2</sup>

Published 23 October 2017 • © 2017 European Physical Society

European Journal of Physics, Volume 38, Number 5

Alessandro Orchini<sup>a,\*,1,2,3</sup>, Hamid Kellay<sup>2</sup>, Andrea Mazzino<sup>1,2,3</sup>

### Journal of Fluid Mechanics

Volume 862 10 March 2019, pp. 348-363

### Dynamics of heavy and buoyant underwater pendulums

Varghese Mathai<sup>1,2,3,4,5,6,7,8,9,10,11,12,13,14,15,16,17,18,19,20,21,22,23,24,25,26,27,28,29,30,31,32,33,34,35,36,37,38,39,40,41,42,43,44,45,46,47,48,49,50,51,52,53,54,55,56,57,58,59,60,61,62,63,64,65,66,67,68,69,70,71,72,73,74,75,76,77,78,79,80,81,82,83,84,85,86,87,88,89,90,91,92,93,94,95,96,97,98,99,100,101,102,103,104,105,106,107,108,109,110,111,112,113,114,115,116,117,118,119,120,121,122,123,124,125,126,127,128,129,130,131,132,133,134,135,136,137,138,139,140,141,142,143,144,145,146,147,148,149,150,151,152,153,154,155,156,157,158,159,160,161,162,163,164,165,166,167,168,169,170,171,172,173,174,175,176,177,178,179,180,181,182,183,184,185,186,187,188,189,190,191,192,193,194,195,196,197,198,199,200,201,202,203,204,205,206,207,208,209,210,211,212,213,214,215,216,217,218,219,220,221,222,223,224,225,226,227,228,229,230,231,232,233,234,235,236,237,238,239,240,241,242,243,244,245,246,247,248,249,250,251,252,253,254,255,256,257,258,259,260,261,262,263,264,265,266,267,268,269,270,271,272,273,274,275,276,277,278,279,280,281,282,283,284,285,286,287,288,289,290,291,292,293,294,295,296,297,298,299,300,301,302,303,304,305,306,307,308,309,310,311,312,313,314,315,316,317,318,319,320,321,322,323,324,325,326,327,328,329,330,331,332,333,334,335,336,337,338,339,340,341,342,343,344,345,346,347,348,349,350,351,352,353,354,355,356,357,358,359,360,361,362,363,364,365,366,367,368,369,370,371,372,373,374,375,376,377,378,379,380,381,382,383,384,385,386,387,388,389,390,391,392,393,394,395,396,397,398,399,400,401,402,403,404,405,406,407,408,409,410,411,412,413,414,415,416,417,418,419,420,421,422,423,424,425,426,427,428,429,430,431,432,433,434,435,436,437,438,439,440,441,442,443,444,445,446,447,448,449,450,451,452,453,454,455,456,457,458,459,460,461,462,463,464,465,466,467,468,469,470,471,472,473,474,475,476,477,478,479,480,481,482,483,484,485,486,487,488,489,490,491,492,493,494,495,496,497,498,499,500,501,502,503,504,505,506,507,508,509,510,511,512,513,514,515,516,517,518,519,520,521,522,523,524,525,526,527,528,529,530,531,532,533,534,535,536,537,538,539,540,541,542,543,544,545,546,547,548,549,550,551,552,553,554,555,556,557,558,559,560,561,562,563,564,565,566,567,568,569,570,571,572,573,574,575,576,577,578,579,580,581,582,583,584,585,586,587,588,589,590,591,592,593,594,595,596,597,598,599,600,601,602,603,604,605,606,607,608,609,610,611,612,613,614,615,616,617,618,619,620,621,622,623,624,625,626,627,628,629,630,631,632,633,634,635,636,637,638,639,640,641,642,643,644,645,646,647,648,649,650,651,652,653,654,655,656,657,658,659,660,661,662,663,664,665,666,667,668,669,670,671,672,673,674,675,676,677,678,679,680,681,682,683,684,685,686,687,688,689,690,691,692,693,694,695,696,697,698,699,700,701,702,703,704,705,706,707,708,709,710,711,712,713,714,715,716,717,718,719,720,721,722,723,724,725,726,727,728,729,730,731,732,733,734,735,736,737,738,739,740,741,742,743,744,745,746,747,748,749,750,751,752,753,754,755,756,757,758,759,760,761,762,763,764,765,766,767,768,769,770,771,772,773,774,775,776,777,778,779,780,781,782,783,784,785,786,787,788,789,790,791,792,793,794,795,796,797,798,799,800,801,802,803,804,805,806,807,808,809,810,811,812,813,814,815,816,817,818,819,820,821,822,823,824,825,826,827,828,829,830,831,832,833,834,835,836,837,838,839,840,841,842,843,844,845,846,847,848,849,850,851,852,853,854,855,856,857,858,859,860,861,862,863,864,865,866,867,868,869,870,871,872,873,874,875,876,877,878,879,880,881,882,883,884,885,886,887,888,889,890,891,892,893,894,895,896,897,898,899,900,901,902,903,904,905,906,907,908,909,910,911,912,913,914,915,916,917,918,919,920,921,922,923,924,925,926,927,928,929,930,931,932,933,934,935,936,937,938,939,940,941,942,943,944,945,946,947,948,949,950,951,952,953,954,955,956,957,958,959,960,961,962,963,964,965,966,967,968,969,970,971,972,973,974,975,976,977,978,979,980,981,982,983,984,985,986,987,988,989,990,991,992,993,994,995,996,997,998,999,1000</sup>

DOI: <https://doi.org/10.1017/jfm.2018.867> Published online by Cambridge University Press: 16 January 2019

\*Not a complete list.

# Even recently...



## All of these studies have one thing in common...

**Let's begin by recalling the  
ordinary differential equation  
model of a pendulum in a  
vacuum.**

Open . Published Online: 01 October 2007 Accepted: June 2007

### Enhanced upswing in immersed collisions of tethered spheres

Physics of Fluids 19, 101701 (2007); <https://doi.org/10.1063/1.2771657>

Hui-Chi Hsu and Hervé Capart

Full . Published Online: 09 Feb

### A pendulum principle of

American Journal of Physics

Douglas Neill Dean Livelybros

### PHYSICAL REVIEW

covering statistical, nonlinear, biologi

### Oscillating pendulum

Diogo Bolster, Robert E. Hershberger  
Phys. Rev. E 81, 046317 – Published

Published Online: 29 April 2013 Accepted: April 2013

### A pendulum in a flowing soap film

Physics of Fluids 25, 041702 (2013); <https://doi.org/10.1063/1.4800057>

M. M. Bandi<sup>1, a)</sup>, A. Concha<sup>1, b)</sup>, R. Wood<sup>1</sup>, and L. Mahadevan<sup>1,2</sup>

European Journal of Physics

PAPER

### Dynamics of damped

G.D.

pendulum

### Journal of Fluid Mechanics

Volume 862 10 March 2019, pp. 348-363

### Dynamics of heavy and buoyant underwater pendulums

Varghese Mathai<sup>1, a1)</sup> (a2), Laura A. W. M. Loeffen<sup>1, a2)</sup>, Timothy T. K. Chan<sup>1, a2)</sup> (a3) and Sander Wildeman<sup>1, a2)</sup> (a4)

DOI: <https://doi.org/10.1017/jfm.2018.867> Published online by Cambridge University Press: 16 January 2019

**\*Not a complete list.**

# Simple Gravity Pendulum

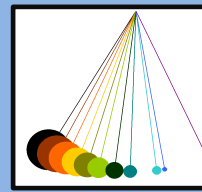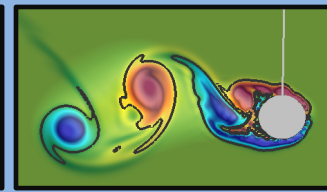

## Simple Gravity Pendulum (not in a fluid)

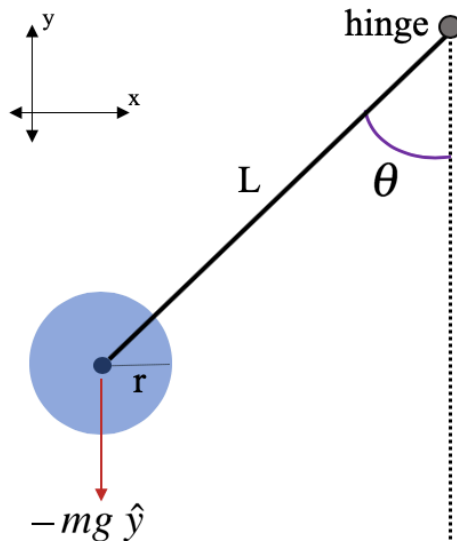

Initial angular displacement of a circular bob  
of radius,  $r$ , and mass,  $m$ ,  
held at a pendulum of length,  $L$

Ordinary Differential Equation Model of a  
**Simple Gravity Pendulum**

$$I \frac{d^2 \theta}{dt^2} + mgL \sin \theta = 0$$

# Simple Gravity Pendulum



## Simple Gravity Pendulum (not in a fluid)



Initial angular displacement of a circular bob  
of radius,  $r$ , and mass,  $m$ ,  
held at a pendulum of length,  $L$

**No loss of amplitude over  
time. Nothing to stop the  
pendulum from swinging.**

Ordinary Differential Equation Model of a  
**Simple Gravity Pendulum**

$$I \frac{d^2 \theta}{dt^2} + mgL \sin \theta = 0$$

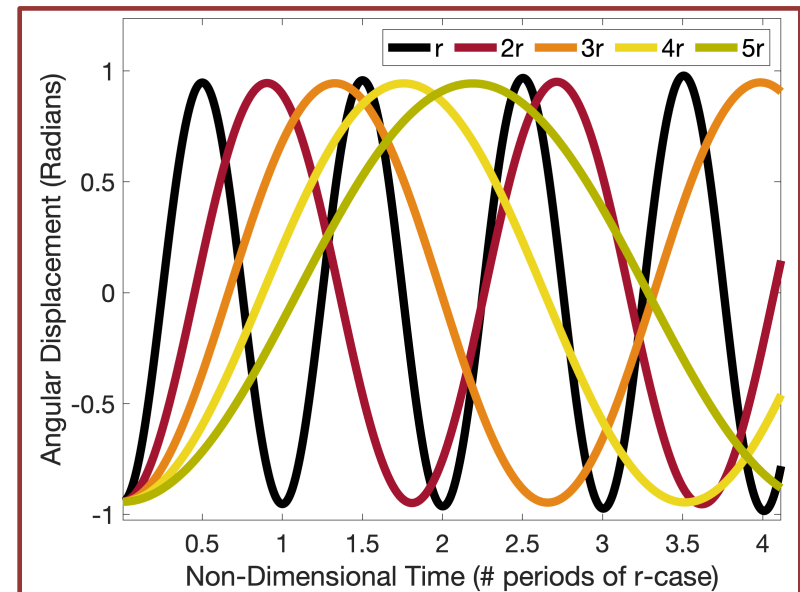

There will be *drag*, fluid drag

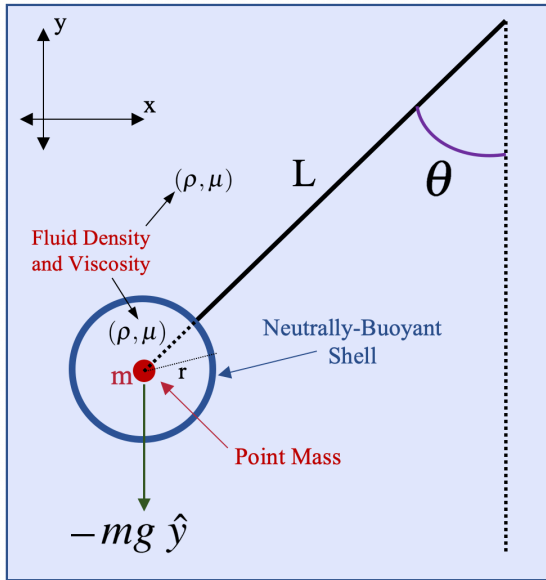

## Pendulum now immersed in a fluid!

## Ordinary Differential Equation Model of a Damped Pendulum

$$I \frac{d^2\theta}{dt^2} + \underbrace{b \frac{d\theta}{dt}}_{\text{New damping term}} + mgL \sin \theta = 0$$

## The damping term:

1. Slows down the pendulum's motion
2. Has a “bulk” parameter,  $b$ , hiding all details about the fluid!

# Putting the Pendulum into a Fluid

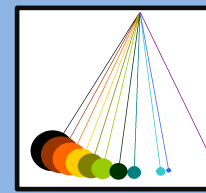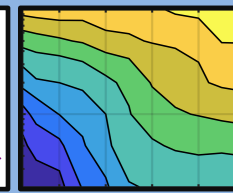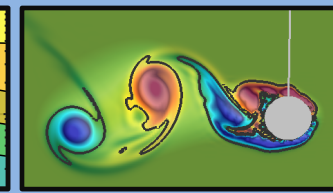

There will be *drag*, fluid drag

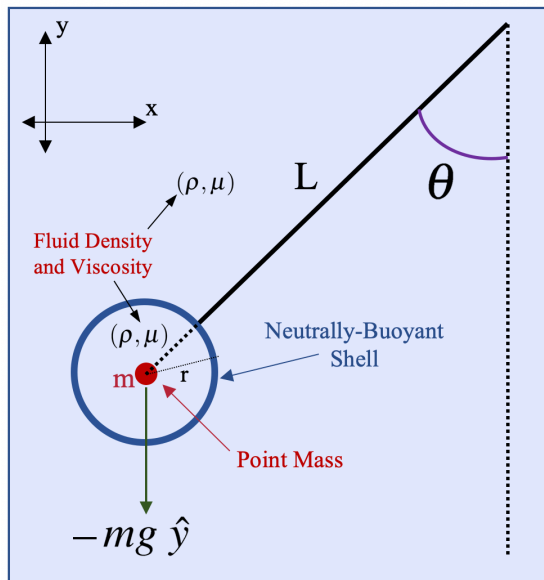

Pendulum now immersed in a fluid!

As damping increases  
(*'b'* increases), the oscillatory  
amplitude decreases

Ordinary Differential Equation Model of a  
**Damped Pendulum**

$$I \frac{d^2\theta}{dt^2} + b \frac{d\theta}{dt} + mgL \sin \theta = 0$$

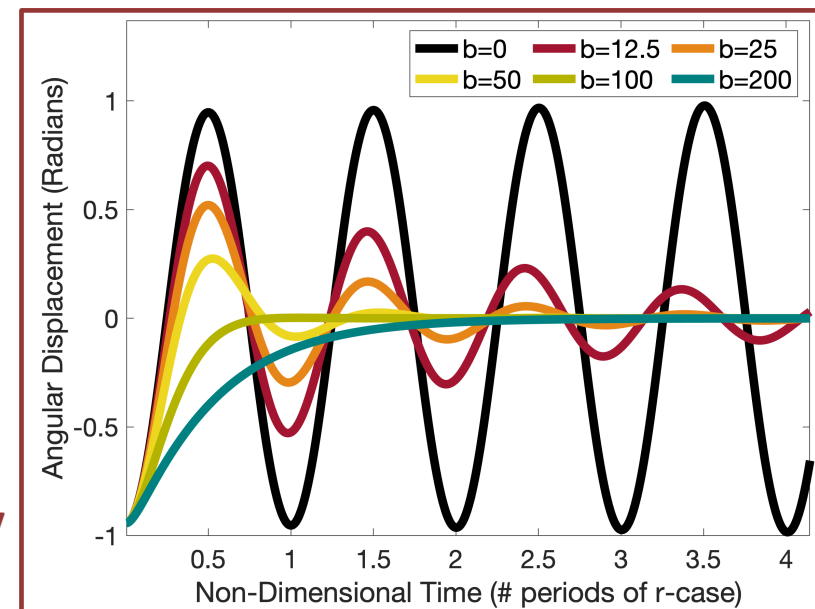



# Putting the Pendulum into a Fluid



**Damping can lead to 3 different behaviors:**

$$I \frac{d^2\theta}{dt^2} + b \frac{d\theta}{dt} + mgL \sin \theta = 0$$

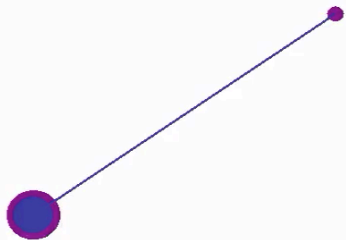

“UNDER-damped”

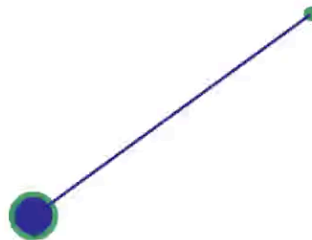

“CRITICALLY-damped”

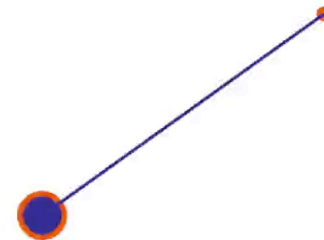

“OVER-damped”

# Putting the Pendulum into a Fluid



## Why does damping take this form?

*(e.g., why does the fluid's effect on the bob take this form?)*

$$I \frac{d^2\theta}{dt^2} + b \frac{d\theta}{dt} + mgL \sin \theta = 0$$

The fluid slows down the pendulum bob proportional to its angular velocity?

# Putting the Pendulum into a Fluid



## Why does damping take this form?

*(e.g., why does the fluid's effect on the bob take this form?)*

$$I \frac{d^2\theta}{dt^2} + b \frac{d\theta}{dt} + mgL \sin \theta = 0$$

This goes back to:  
**Sir George Gabriel Stokes**

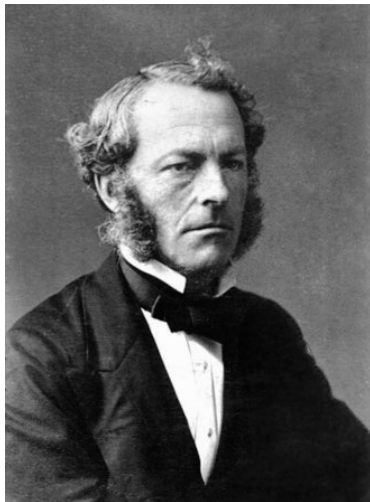

The fluid slows down the pendulum bob  
proportional to its angular velocity?

Was kind of a big deal in fluid dynamics  
(...and mathematics and physics!)

# Stokes and Pendulums



## Stokes Drag Law first introduced in 1850:

X. *On the Effect of the Internal Friction of Fluids on the Motion of Pendulums.*  
By G. G. STOKES, M.A., *Fellow of Pembroke College, and Lucasian Professor of Mathematics in the University of Cambridge.*

---

[Read December 9, 1850.]

**The drag force on a sphere**  
(at low Reynolds Numbers,  $Re$ )

$$F_D = 6\pi\mu r v$$

(Drag force is proportional to velocity!)

Force Law Parameters:

$\mu$  - Fluid's viscosity ('stickiness')

$r$  - Radius of sphere

$v$  - Speed of moving sphere

# Wait, what is a Reynolds Number?



## Reynolds Number:

*Ratio of inertial forces to viscous forces in a fluid system*

$$Re = \frac{\rho L U}{\mu}$$

*\*can help categorize fluid-scale of the system allowing one to get an intuitive sense of the dynamics a priori\**

**Fluid** Parameters:

$\rho$  - Fluid Density

$\mu$  - Fluid (dynamic) Viscosity

**System** Parameters:

$L$  - Characteristic Length-scale of system

$U$  - Characteristic Speed-scale of system

# Wait, what is a Reynolds Number?



## Reynolds Number:

*Ratio of inertial forces to viscous forces in a fluid system*

$$Re = \frac{\rho L U}{\mu}$$

*\*can help categorize fluid-scale of the system allowing one to get an intuitive sense of the dynamics a priori\**

### Low Re ( $Re \ll 1$ )

Can occur when:

- Small length scales (like a cell)
- Very low speeds

### High Re ( $Re \gg 1$ )

Can occur when:

- Large length scales (like a fish)
- Very high speeds

# Is Stokes Drag valid for a Pendulum?



What if pendulum is not in a  
Low Reynolds Number setting?



# Is Stokes Drag valid for a Pendulum?



There's another drag law:

## *Lord Rayleigh's Drag Law*

...and in comes former  
student on Sir G.G. Stokes!

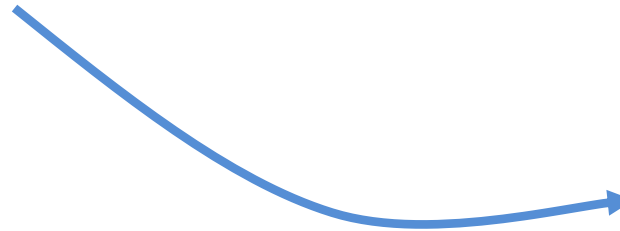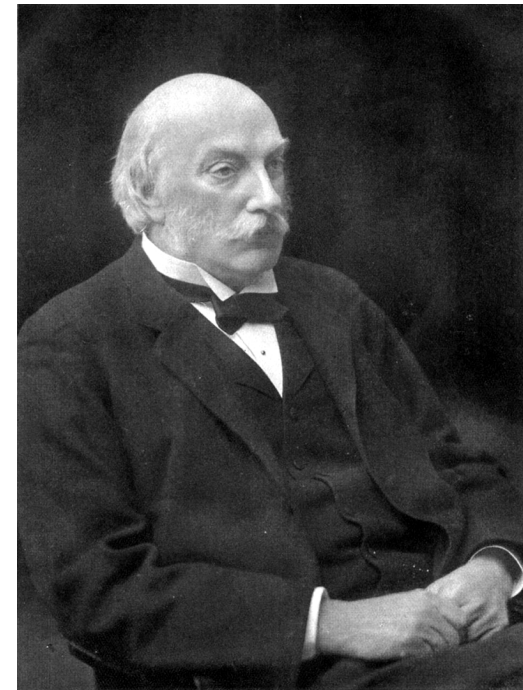

Lord Rayleigh (aka John William Strutt)

# Is Stokes Drag valid for a Pendulum?



There's another drag law:

## *Lord Rayleigh's Drag Law*

$$F_D = \frac{1}{2} \rho A C_D v^2$$

*(Drag force is proportional to velocity-squared!)*

**Force Law Parameters:**

$\rho$  - Fluid Density       $A$  - Cross-sectional area of object in flow  
 $v$  - Speed       $C_D$  - Drag coefficient

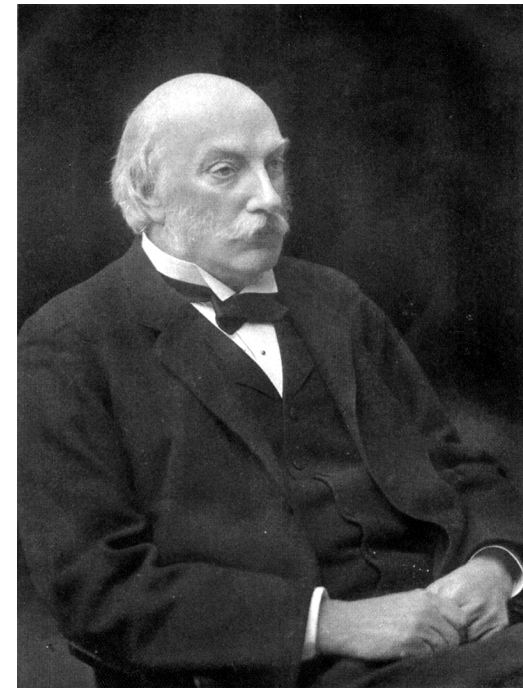

**Lord Rayleigh**

(aka John William Strutt)

[https://commons.wikimedia.org/wiki/File:John\\_William\\_Strutt.jpg](https://commons.wikimedia.org/wiki/File:John_William_Strutt.jpg)

# Is Stokes Drag valid for a Pendulum?



## *What about pendulums?*

$$I \frac{d^2 \theta}{dt^2} + b \frac{d\theta}{dt} + mgL \sin \theta = 0$$

### Questions:

- The damping term takes the form of Stokes Drag Law – is this valid? Why or why not Lord Rayleigh's?
- Maybe both are valid for pendulums in different situations?
- Would the mass and size of a pendulum bob affect these assumptions?

# Turning to numerical simulation...



## *How to test this?*

$$I \frac{d^2\theta}{dt^2} + b \frac{d\theta}{dt} + mgL \sin \theta = 0$$

### Note:

- Need experimental data to validate either drag force law in the above equation
- Could construct physical models of pendulums in air (or water)...
- But, unless we use sophisticated flow visualization techniques (like particle image velocimetry for example), we wouldn't obtain details about how the fluid reacts to the pendulum bob's swinging motion (e.g., what the underlying fluid dynamics are)
- We can turn to computers, numerical simulation experiments, and fluid-structure interaction models to give us the details!

# Outline:



- **A pendulum tale...**
  - History & Reduced-Order Model
  - **Fluid-Structure Interaction (FSI) Model**
  - Comparison and Validation

# Fluid-Structure Interaction Model

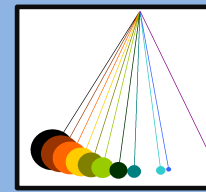

## Computational Setup

### Idea:

- Construct computational fluid dynamics (CFD) model using fluid-structure interaction (FSI) techniques using the *immersed boundary method*
- Create circular pendulum bobs, w/ mass concentrated at center of bob, of radius,  $r$ , and pendulum length,  $L$
- Allow bob to freely swing under gravity thereby interacting with the fluid it is immersed within
- Beyond gravity's downward direction, do not prescribe any other force acting on the bob; fluid drag will happen naturally in the FSI framework

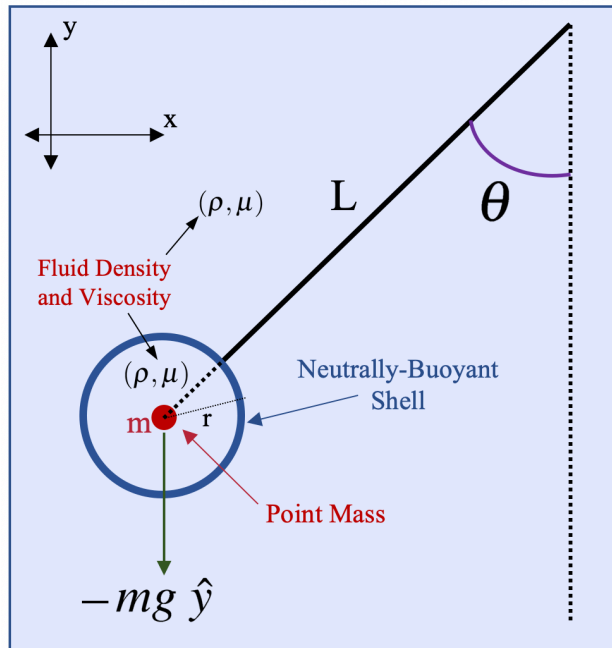

# Fluid-Structure Interaction Model

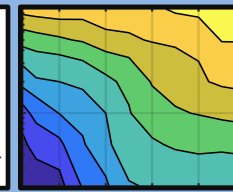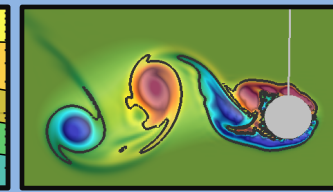

## *Computational Geometry* (how the discretized geometry and model is initiated)

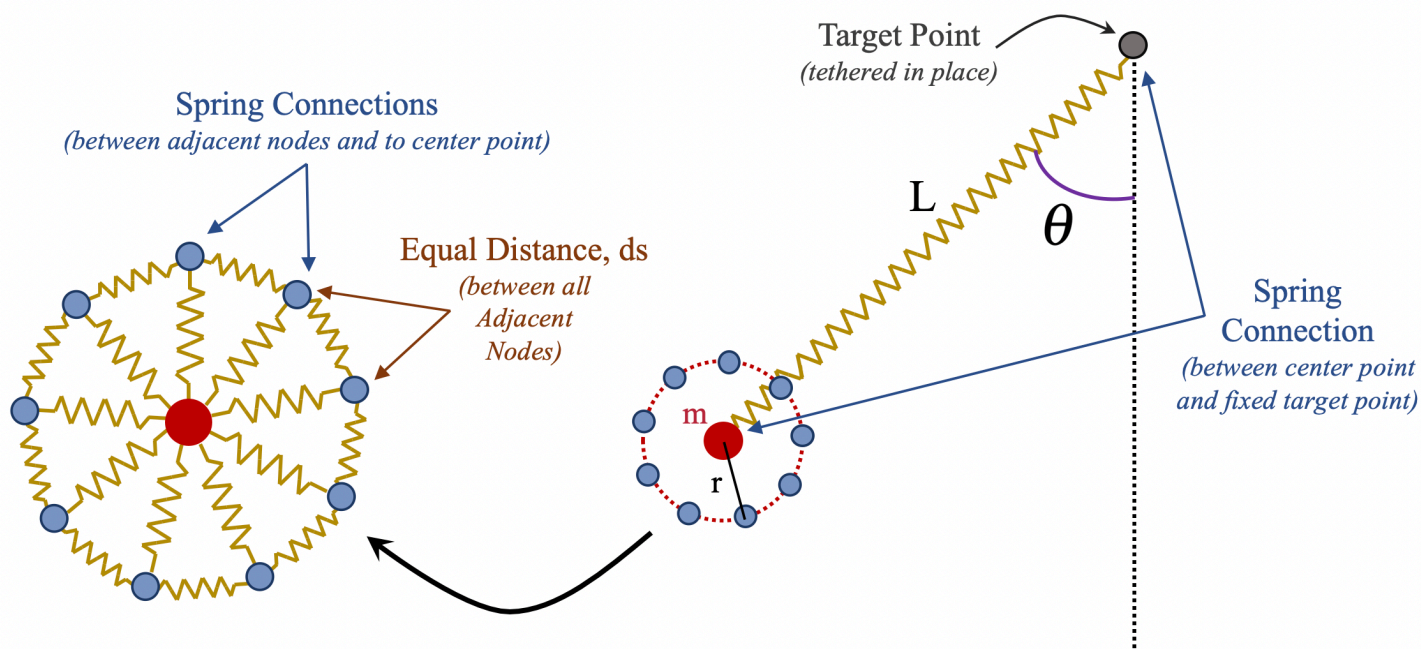

- Key Ideas:
- Computers need discretized boundaries - they don't know real numbers!
  - Can form boundaries in *immersed boundary* using springs and other ideas from foundational physics courses



# FSI Pendulum Results



## *Lagrangian Data*

*(position and forces on the pendulum over time)*

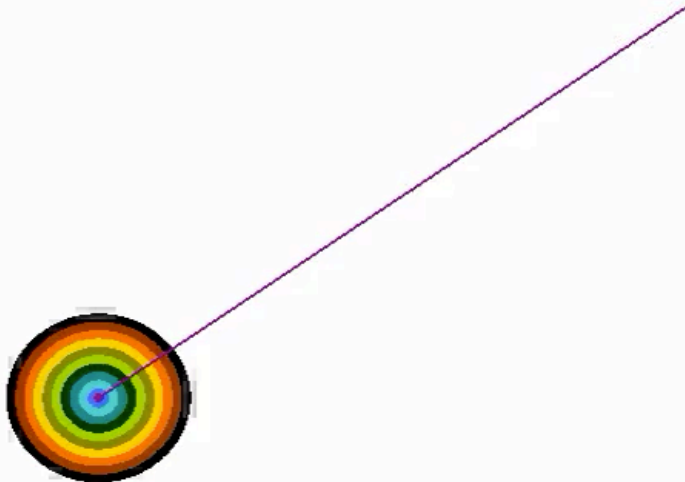

### Each Pendulum Bob has:

- Same point mass value at center
- Different radii

### Note:

- Larger bobs are slower
- Larger bobs have less angular displacement
- **Does this mean more drag?**

# FSI Pendulum Results: Angular Displacement

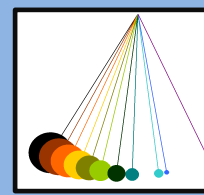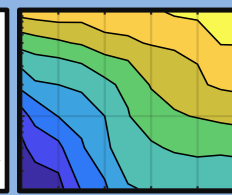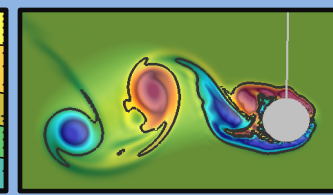

## *Angular Displacement (radians) vs. Time (s)*

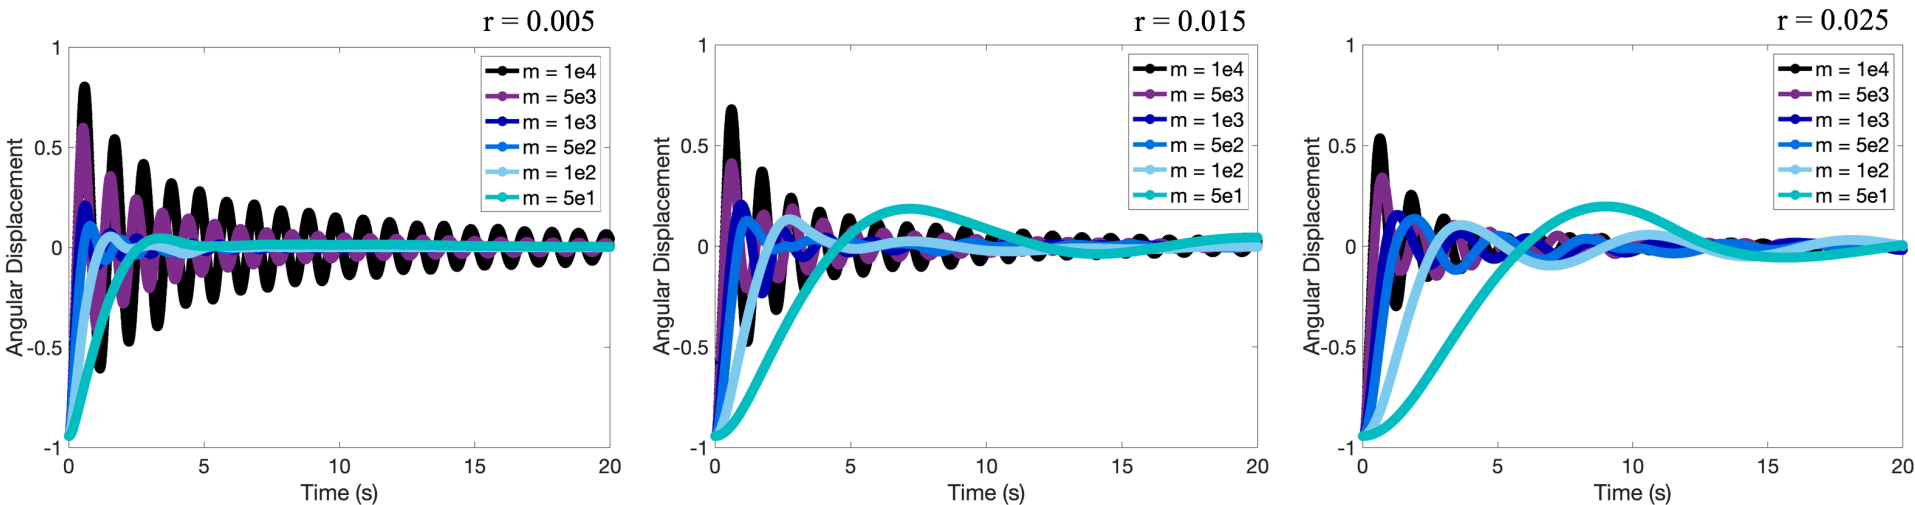

### Note:

- Both the mass and radii of the bob affect its angular displacement over time
- Same radii bob, could display different damping behavior depending on its mass.

# FSI Pendulum Results: Angular Displacement

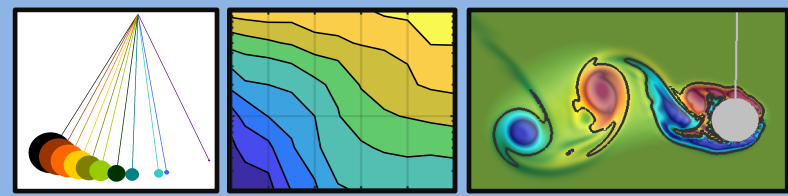

## *Height at peak displacement (m) vs. Peak Number* (radius of bob = 0.005m)

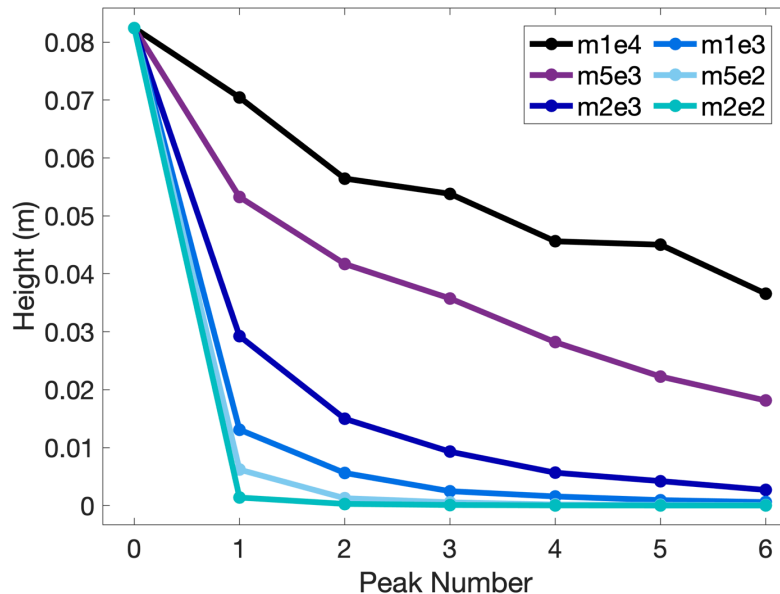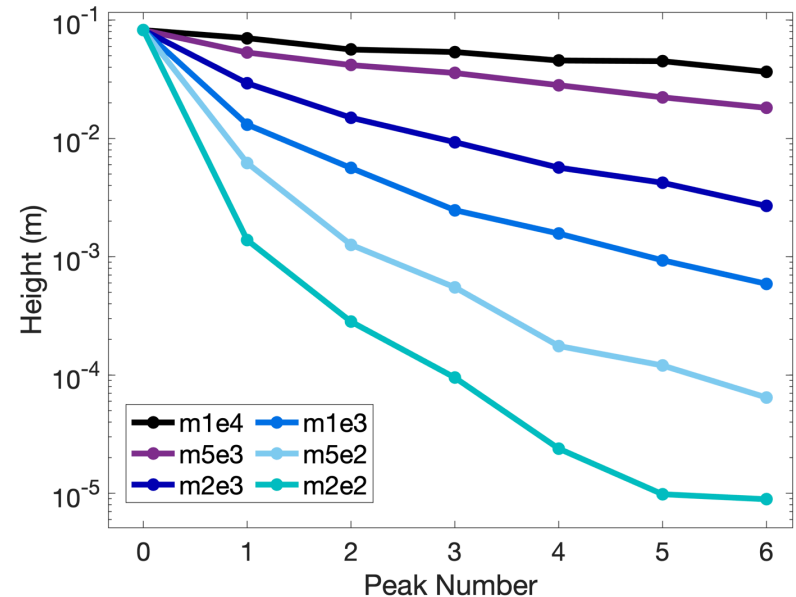

- Note:**
- Higher masses maintain higher amplitude oscillations and hence heights for a given radii
  - Semi-logarithmic plot illustrates linear relationship between  $\log(\text{height})$  and peak number -> **exponential relationship** after a few swings!

# FSI Pendulum Results: Angular Displacement

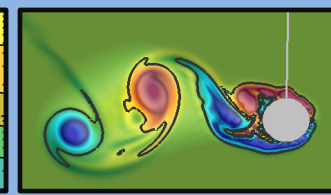

## *Damped Period of Oscillation (s)* (as function of both mass and radius)

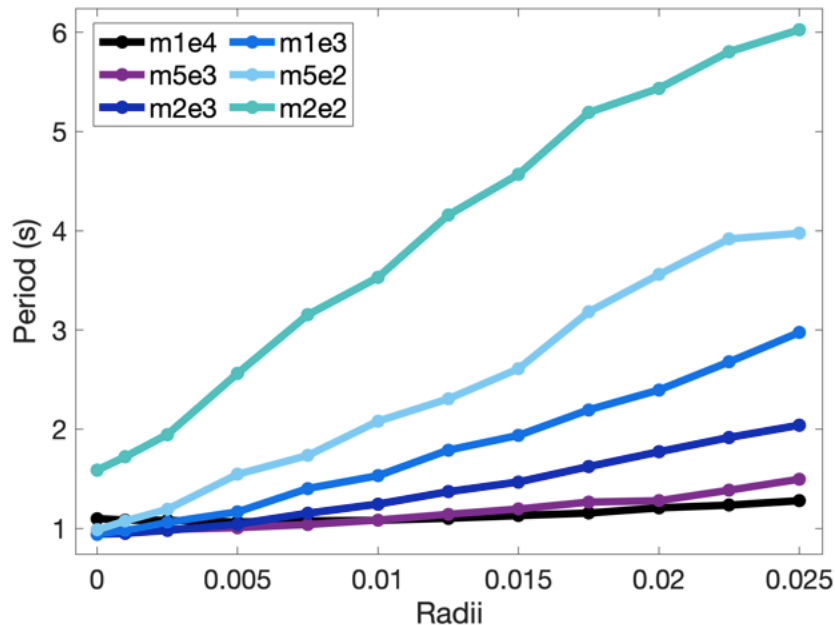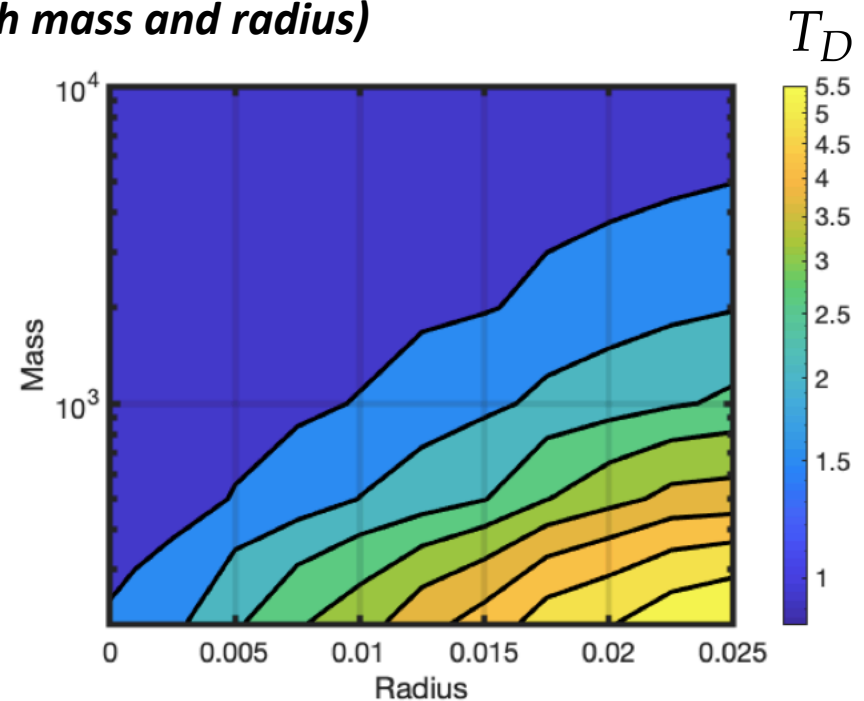

- Note:**
- Higher mass cases generally have lower periods
  - As radius increases, the period also increases

# FSI Pendulum Results: Speed



## *Linear Speed (m/s) of Pendulum Bob* (radius = 0.015m)

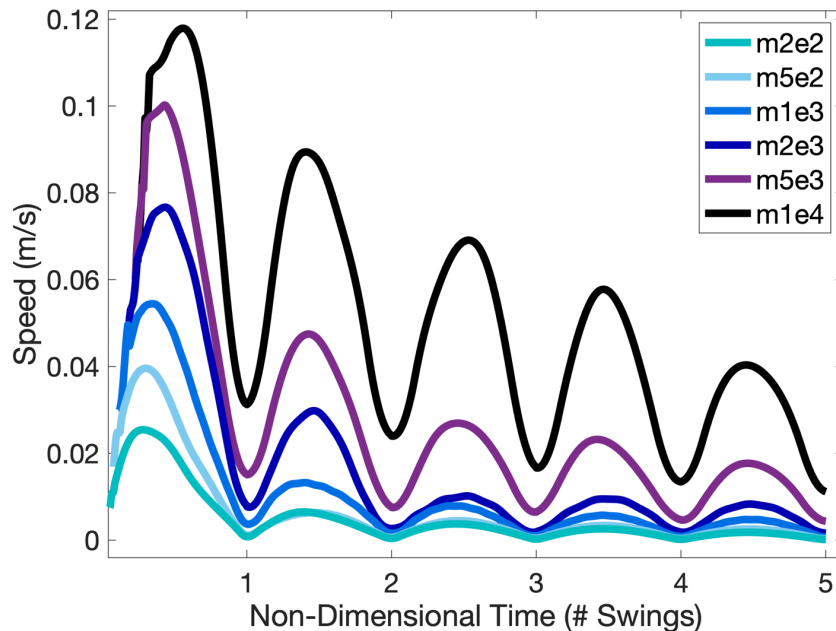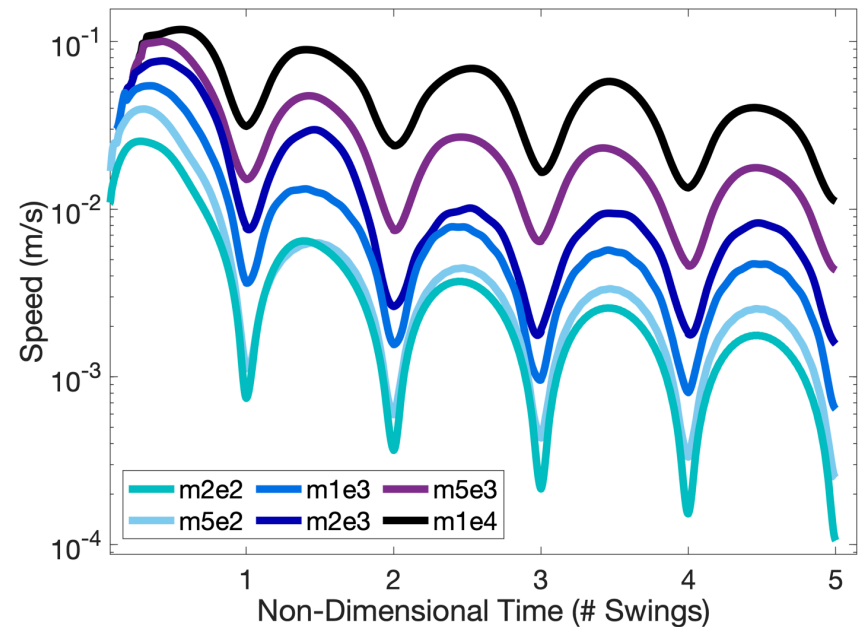

- Note:**
- Higher mass cases are faster than lower mass cases for a given radii
  - Semi-logarithmic plot shows some linear relationships in peak speed...although looks like there are multiple regimes...

# FSI Pendulum Results: Speed



*Linear Speed (m/s) of Pendulum Bob*  
(radius = 0.015m)

## Note:

- Peak Speed drops off significantly from 1<sup>st</sup> to 2<sup>nd</sup> peak (for  $m < 1e4$ )
- There looks like the **damping mechanism is enhanced** during the first swing!

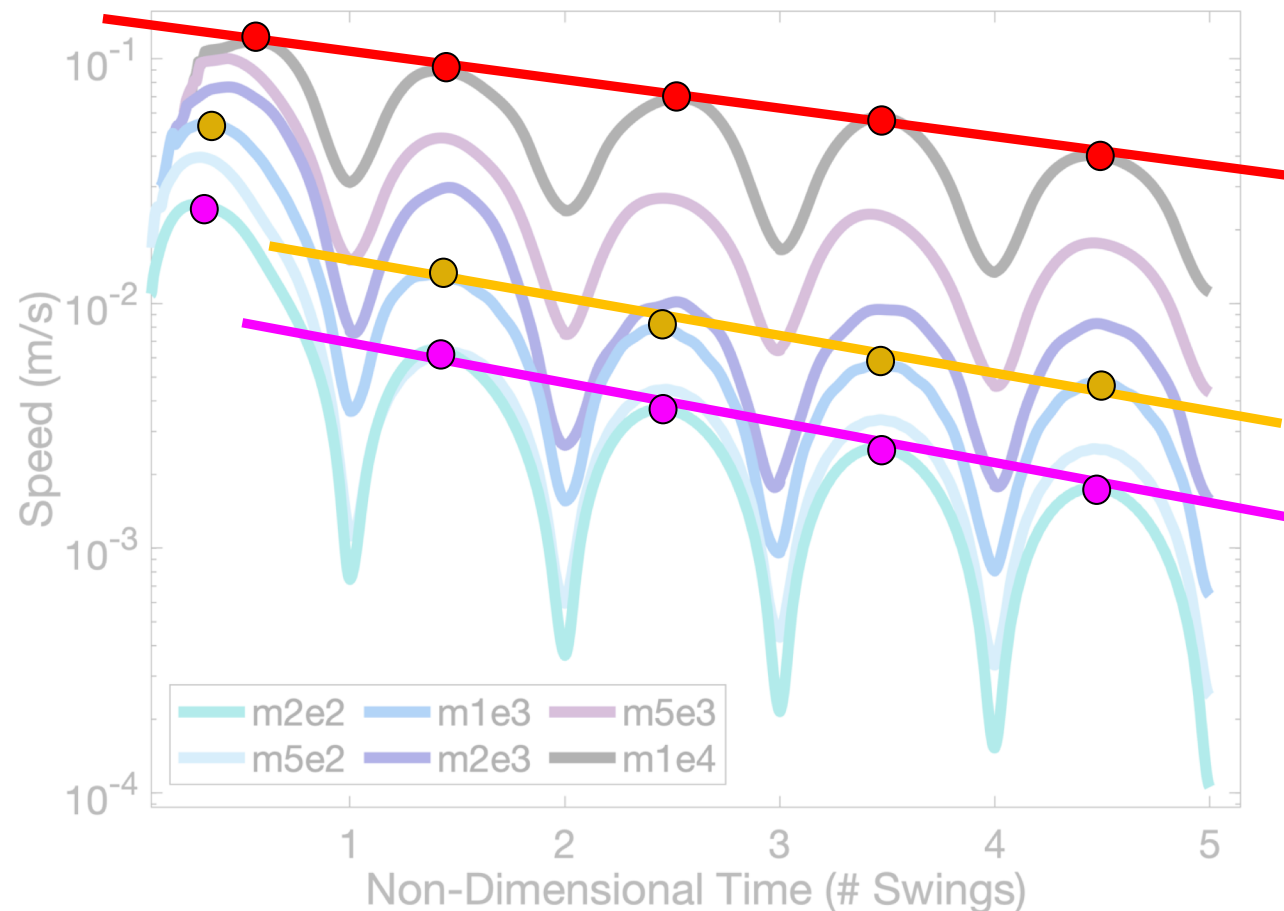

# FSI Pendulum Results: Speed



*Phase Space: Speed (m/s) vs. Angular Displacement (radians)*  
(radius = 0.001m)

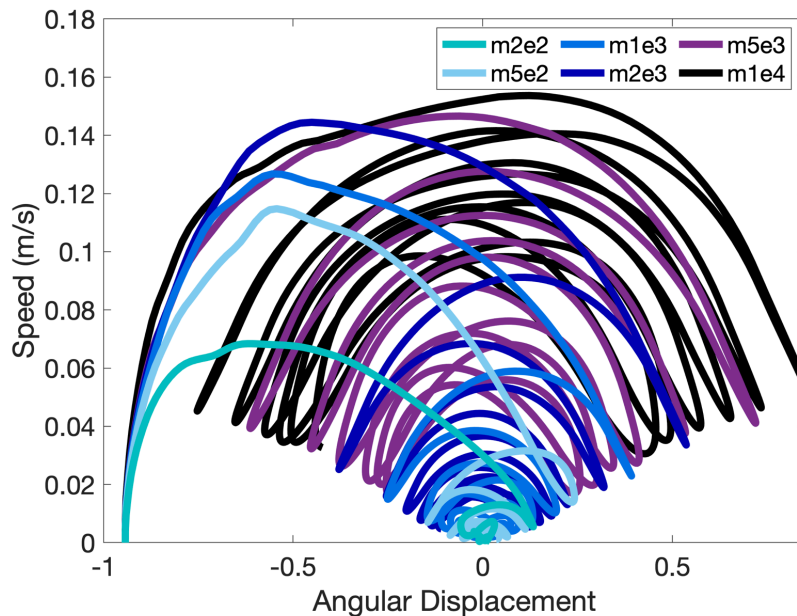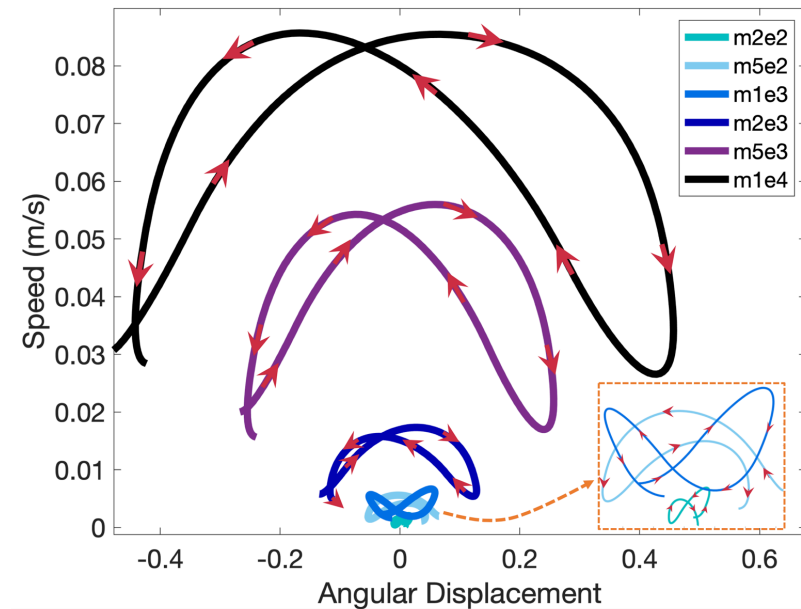

- Note:**
- All data seems to collapse onto parabolically-capped cone
  - Speeds increase when reaching zero displacement from vertical



# FSI Pendulum Results: Forces



## *Drag Forces (N) vs. Time (s)* (radius = 0.001m)

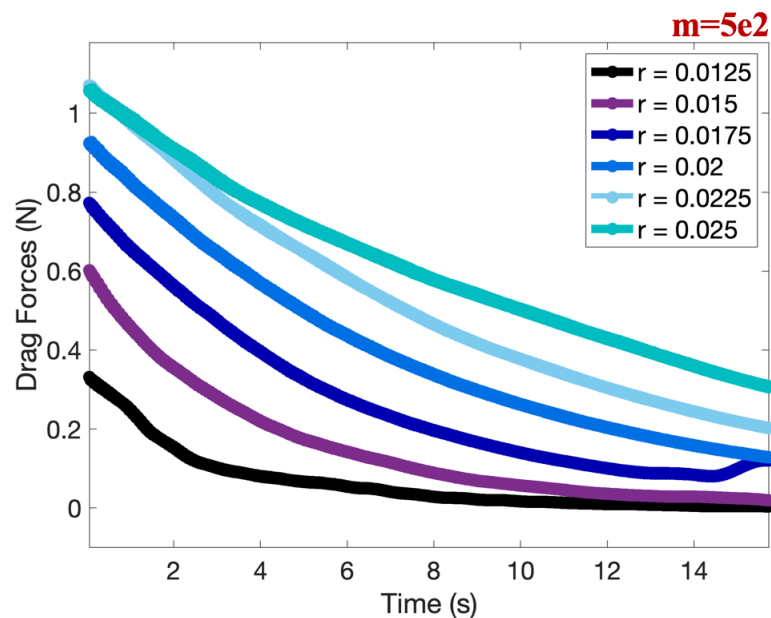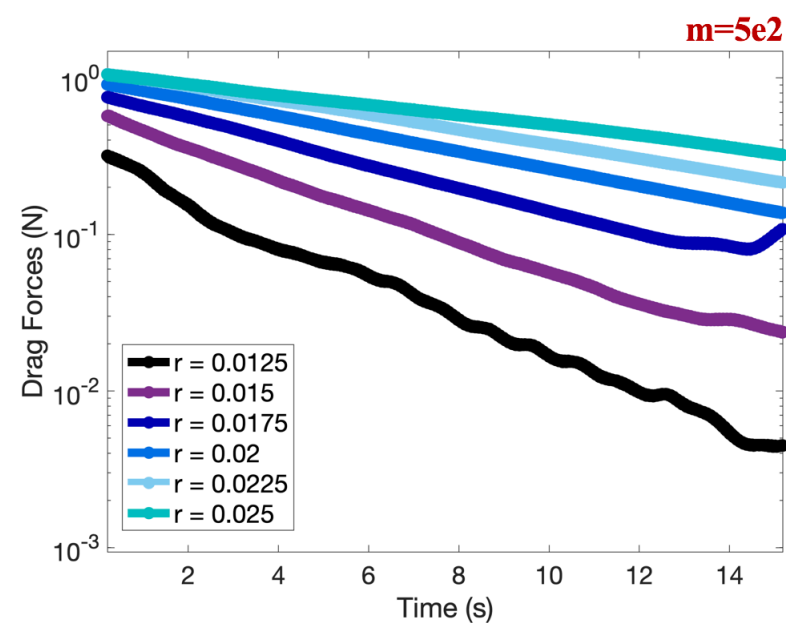

- Note:**
- Drag acts in opposite direction to bob's motion
  - Larger radii undergo more fluid drag
  - Linear relationship between  $\log(\text{Drag})$  and Time -> **Exponential Relationship!**

# FSI Pendulum Results

## Forces

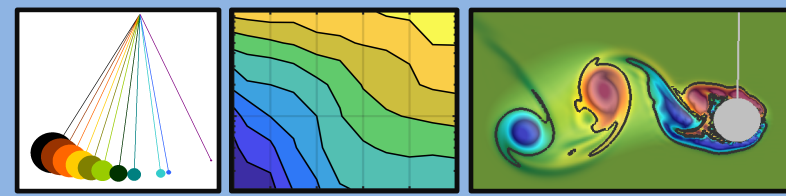

*Time-dependent Reynolds Number  
vs. Time (s)*

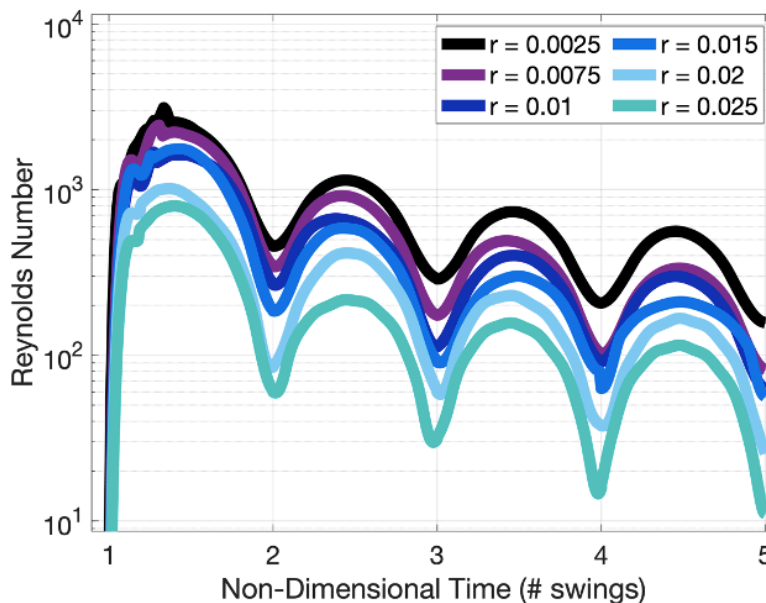

*Avg. Reynolds Number During 1st Swing  
(function of mass and radius)*

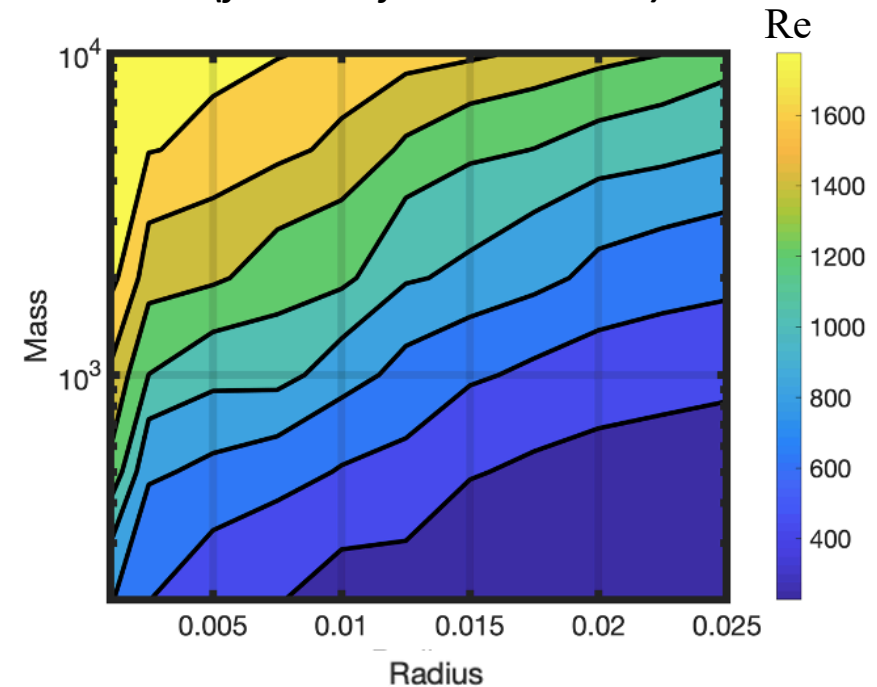

- Note:**
- The average  $Re \gg 1$  during most of the first swing
  - $Re$  minimizes when speed of bob nears zero during each swing
  - Since each swing's peak speed will continually decrease as the pendulum oscillates,  $Re$  will get smaller and smaller
  - Lower radii and higher masses give rise to larger  $Re$

# FSI Pendulum Results

## Forces

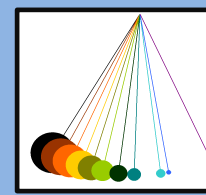

### *Avg. Drag Coefficient During the 1<sup>st</sup> Swing* (as function of mass and radii)

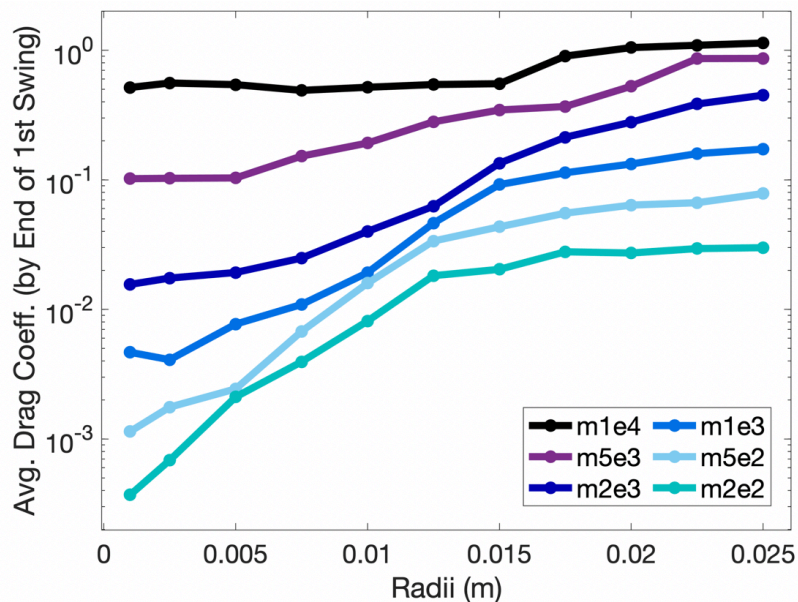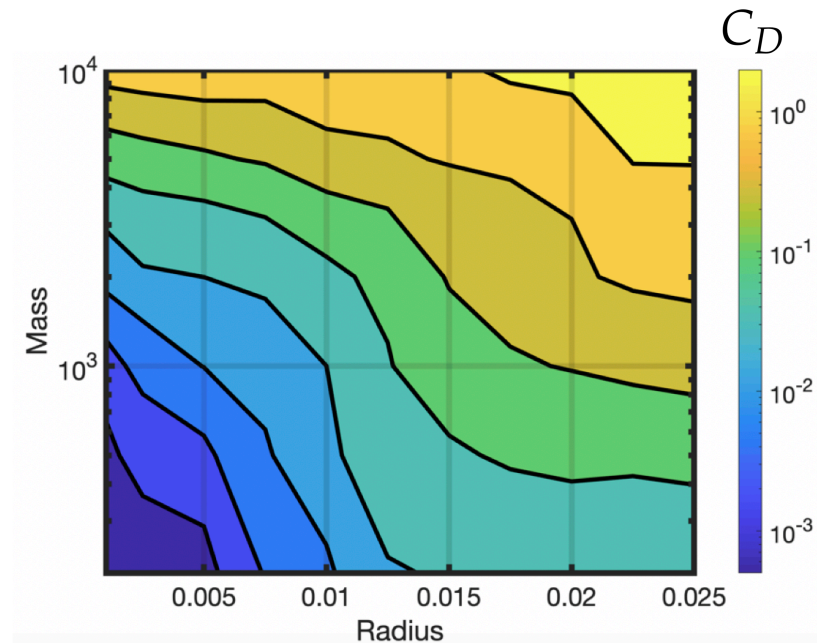

- Note:**
- Drag Coefficient increases as radii increases
  - Drag Coefficient increases as mass increases as well
  - Non-Linear relationship between drag coefficient, mass, and radii.

# FSI Pendulum Results: Fluid Dynamics



*Well, what is the fluid doing in response to the pendulum swinging through it?*

# FSI Pendulum Results: Fluid Dynamics



*What the fluid is doing!*

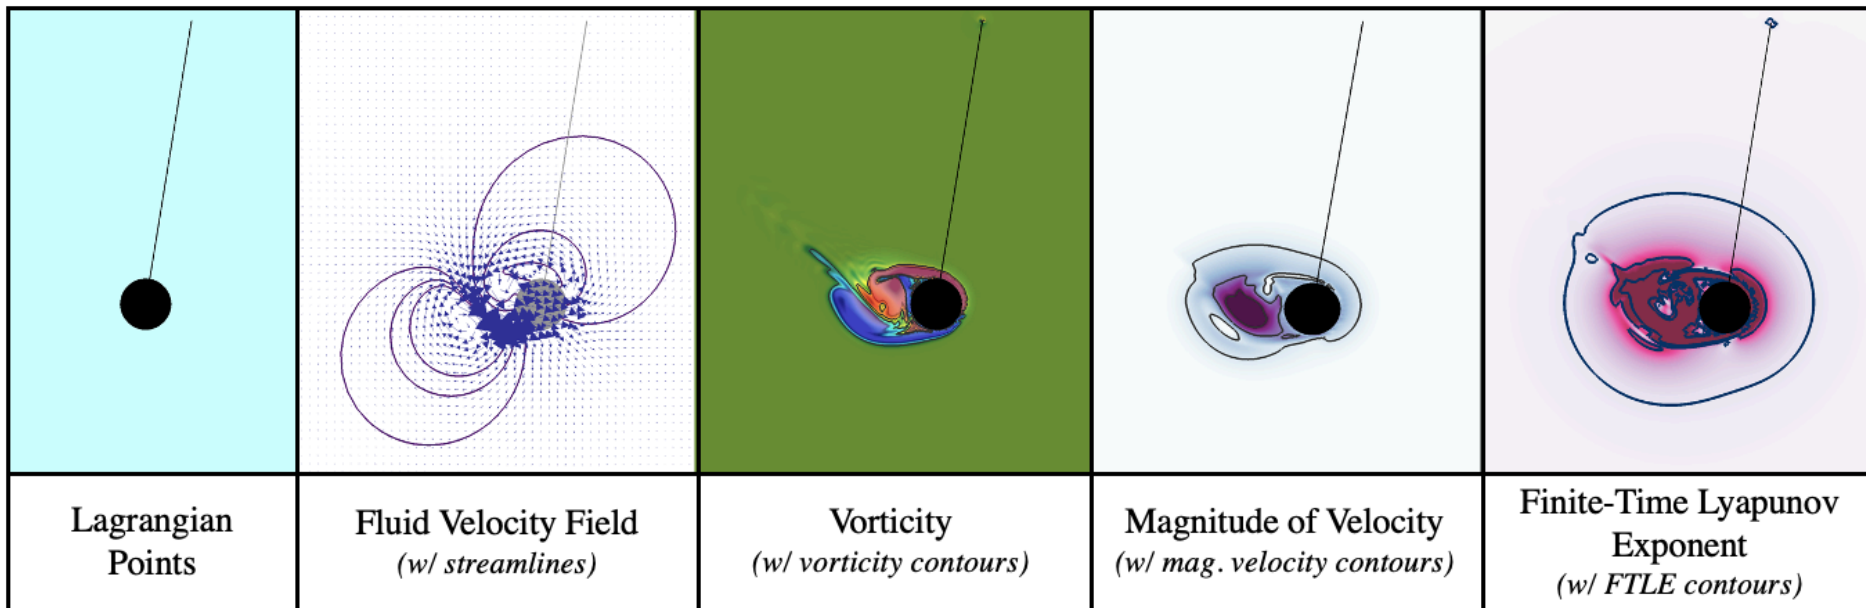

**Through CFD simulations are able to gain information about the fluid dynamics as well as the pendulum bob!**

# FSI Pendulum Results: Fluid Dynamics



*What the fluid is doing!*  
**Colormap: Magnitude of Velocity**

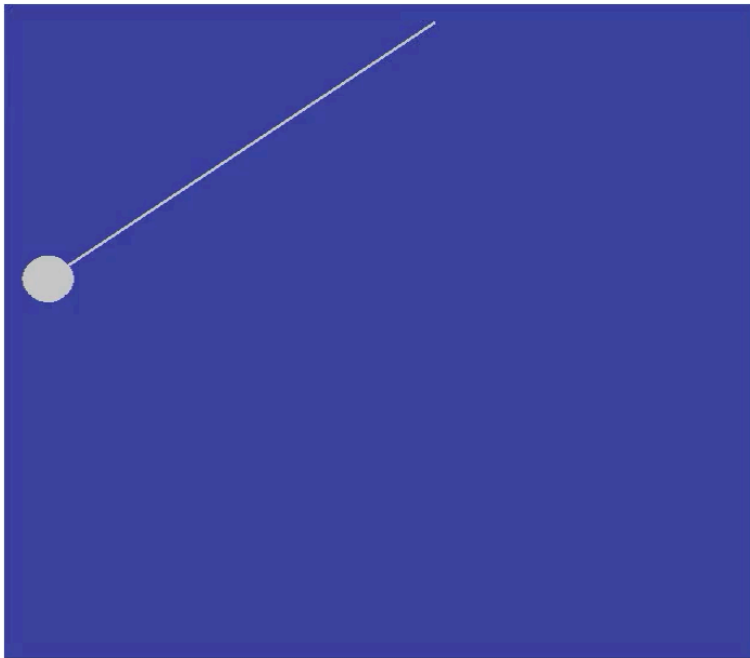

$(m=5e2, r=0.01m)$

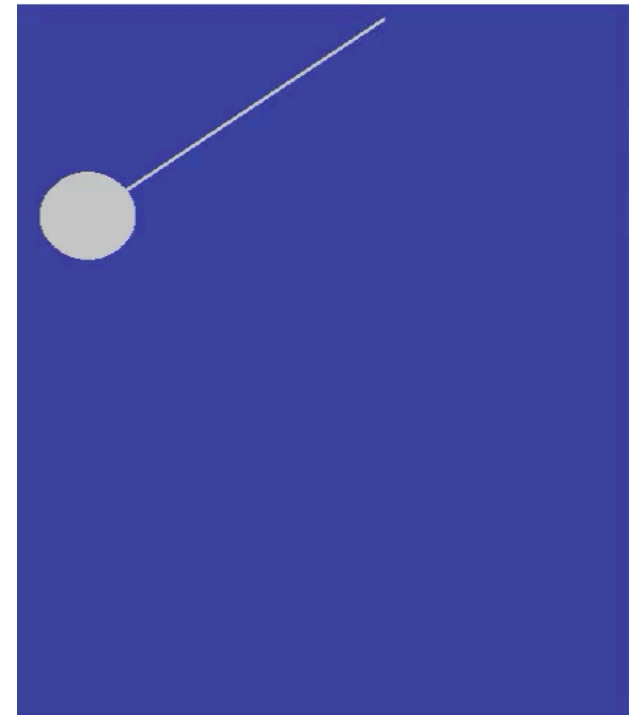

$(m=5e2, r=0.025m)$

**Fastest moving fluid is directly behind the pendulum bob!**

# FSI Pendulum Results: Fluid Dynamics



*What the fluid is doing!*  
**Colormap: Vorticity**

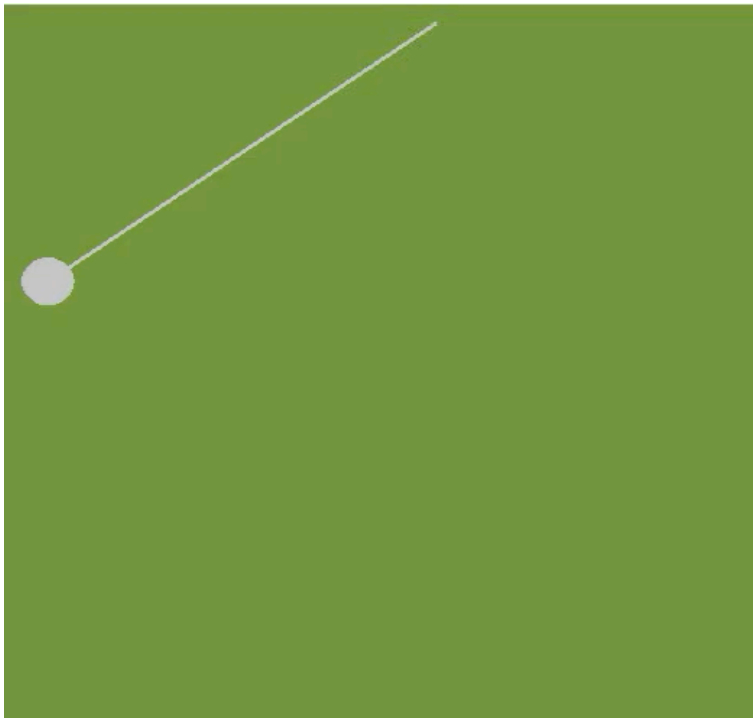

( $m=5e2$ ,  $r=0.01m$ )

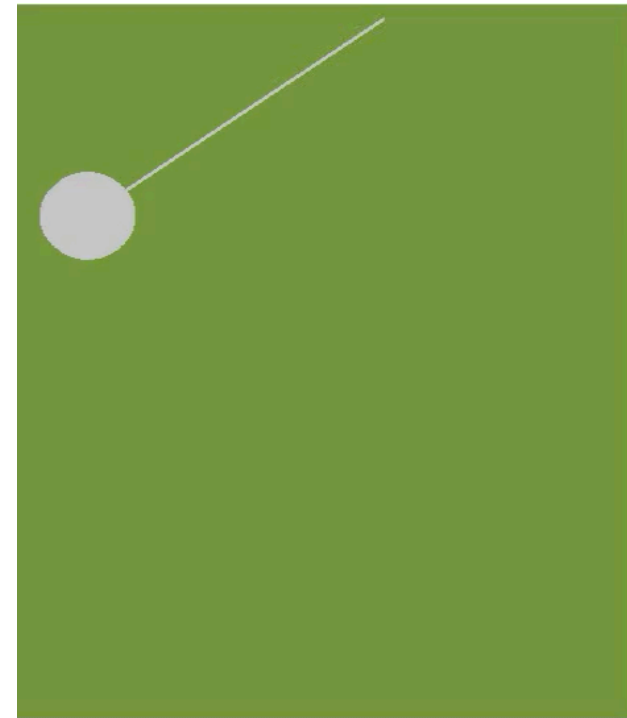

( $m=5e2$ ,  $r=0.025m$ )

**Vortices are being shed off of the pendulum bob!**

# FSI Pendulum Results: Fluid Dynamics



*What the fluid is doing!*

## ***Vector Field: Velocity***

*(w/ Mag. Of Velocity colormap)*

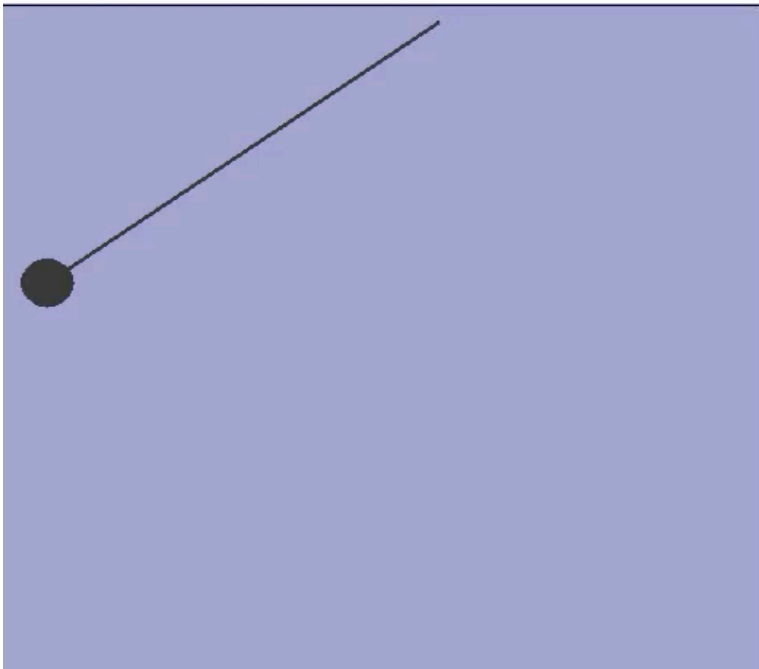

$(m=5e2, r=0.01m)$

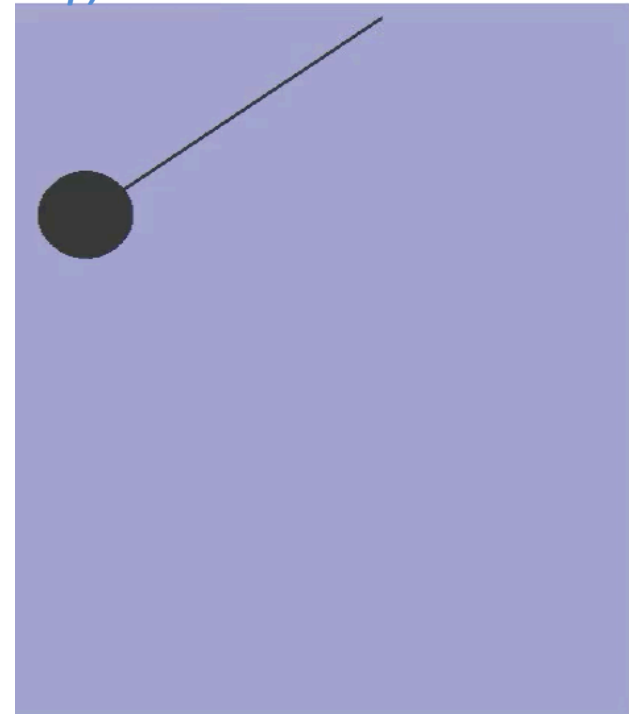

$(m=5e2, r=0.025m)$

**Velocity Field Shows that due to vortex formation, fluid is accelerated towards the fluid bob -> *Drafting!***



# Outline:



- **A pendulum tale...**

- History & Reduced-Order Model
- Fluid-Structure Interaction (FSI) Model
- **Comparison and Validation**

# Comparing: FSI vs. ODE Model



## Damping Pendulum ODE Model

$$\frac{d^2\theta}{dt^2} + \frac{b}{I} \frac{d\theta}{dt} + \frac{mgL}{I} \sin \theta = 0$$

Coefficient on  
the damping  
term

$\omega_N^2$   
(Natural, undamped  
angular frequency)

# Comparing: FSI vs. ODE Model



## Damping Pendulum ODE Model

$$\frac{d^2\theta}{dt^2} + \frac{b}{I} \frac{d\theta}{dt} + \frac{mgL}{I} \sin \theta = 0$$

Coefficient on  
the damping  
term

$\omega_N^2$   
(Natural, undamped  
angular frequency)

**Caution:** Not the true, natural, undamped angular frequency b/c we did not invoke the small angle approximation to say  $\sin \theta \approx \theta$  for small  $\theta$

# Comparing: FSI vs. ODE Model



## Damping Pendulum ODE Model

$$\frac{d^2\theta}{dt^2} + \frac{b}{I} \frac{d\theta}{dt} + \frac{mgL}{I} \sin \theta = 0$$

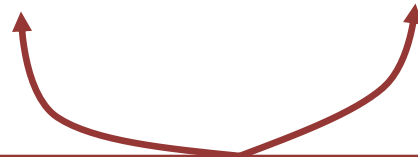

Need to match these parameter values  
to FSI Model to perform a comparison.

# Comparing: FSI vs. ODE Model

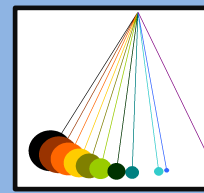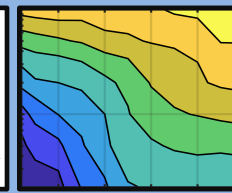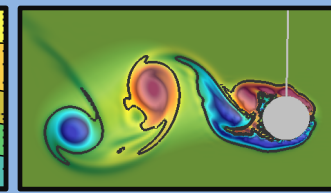

## 1. Finding the damping coefficient: $b / I$

### Plan:

#### 1. Find exponential decay rate:

1. Fit linear regression through logarithm of peak angular displacement vs. time:

$$\gamma = -\frac{b}{2I}$$

2. Multiply by -2

$$b / I = -2\gamma$$

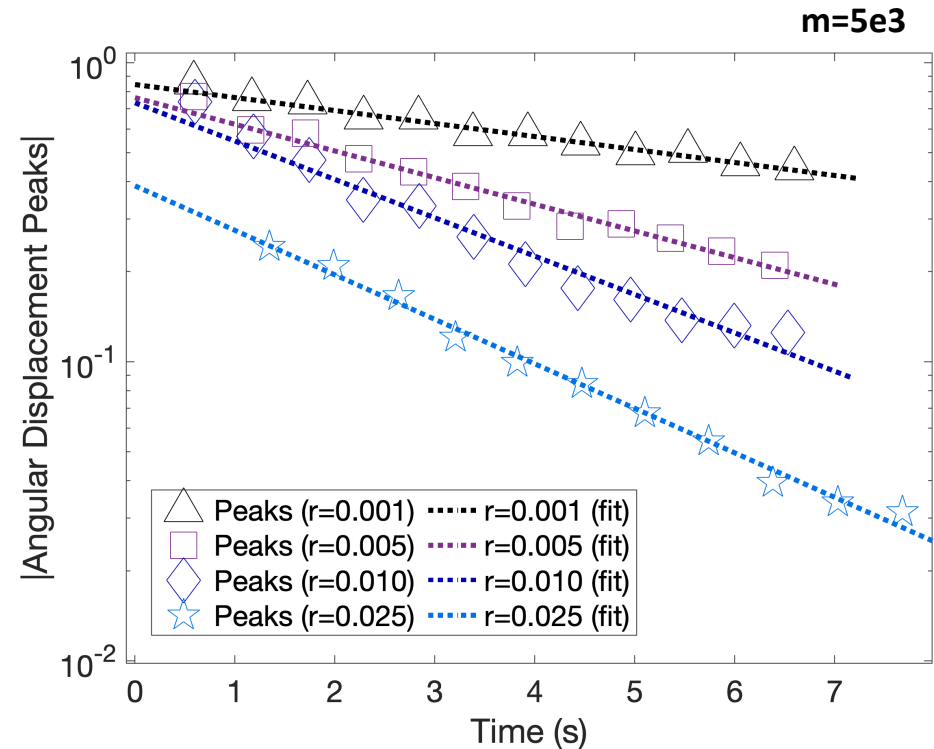

# Comparing: FSI vs. ODE Model



## 2. Finding natural angular frequency: $\omega_N^2$

### Plan:

1. Compute damped angular frequency from damped period:

$$\omega_D = \frac{2\pi}{T_D}$$

2. Recall relationship between damped and natural angular frequency and damping,

$$\omega_D^2 = \omega_N^2 - \gamma^2$$

3. Compute natural (undamped frequency):

$$\omega_N^2 = \frac{mgL}{I} = \frac{4\pi^2}{T_D^2} + \gamma^2$$

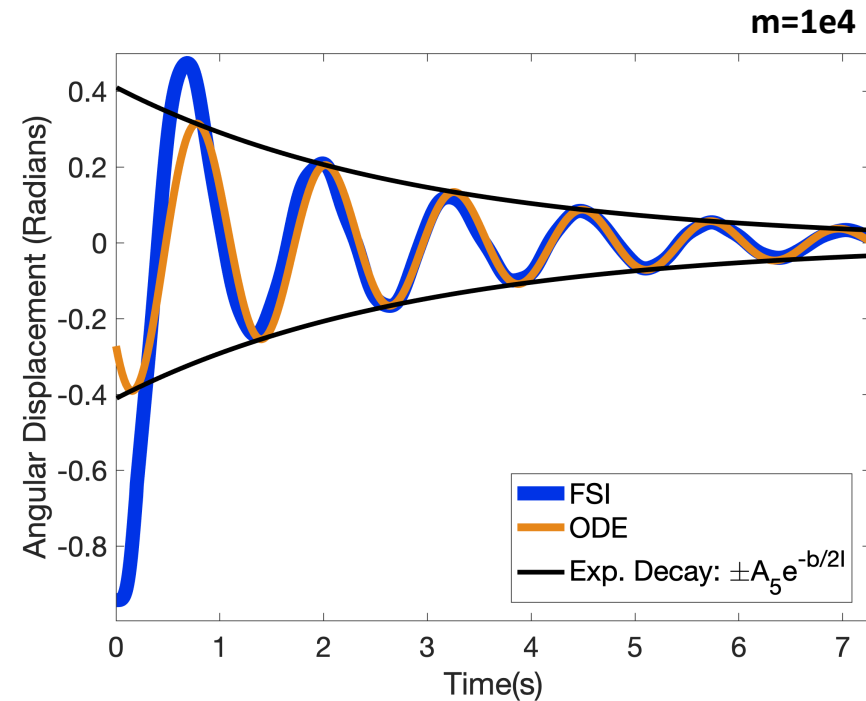

*Note: Moment of Inertia not straight-forward to calculate here due principle of added mass*

# Comparing: FSI vs. ODE Model



## Comparisons!

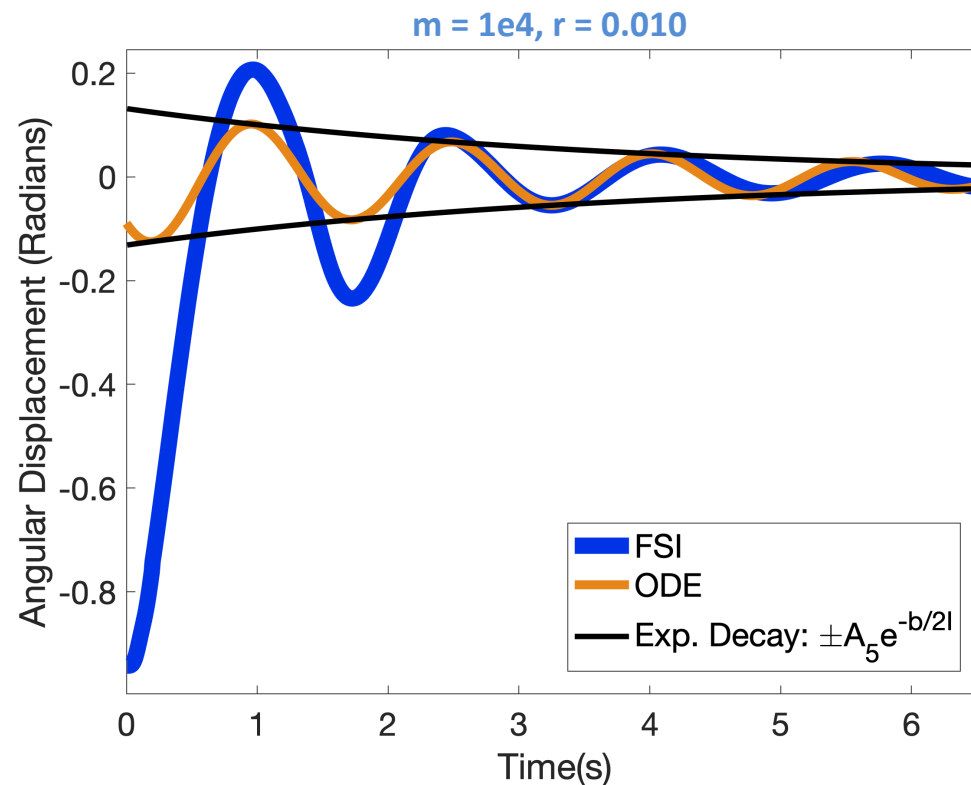

### Note:

- ODE model solution found by starting at **5<sup>th</sup> peak** and propagating *forward and backward* in time
- Exponential decay plotted in similar manner
- Both exponential decay and ODE model agree well with FSI model after a few peaks

# Comparing: FSI vs. ODE Model



## Comparisons!

$m = 5e2, r = 0.005$

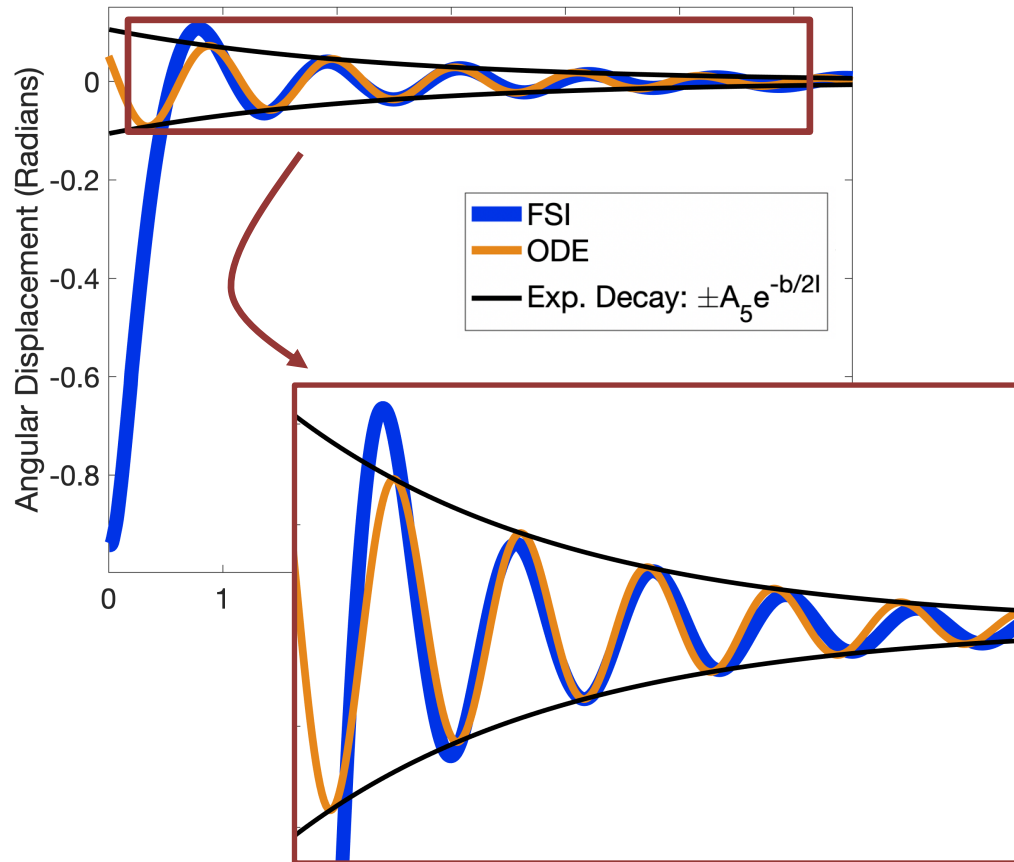

### Note:

- ODE model solution found by starting at **5<sup>th</sup> peak** and propagating *forward and backward* in time
- Exponential decay plotted in similar manner
- Both exponential decay and ODE model agree well with FSI model after a few peaks



# Comparing: FSI vs. ODE Model

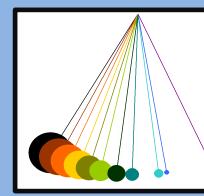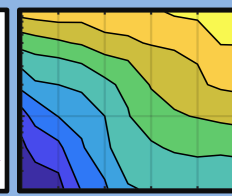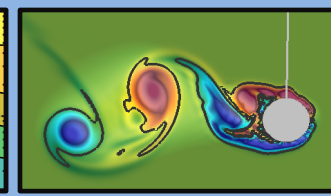

Validation is good...after a couple swings!

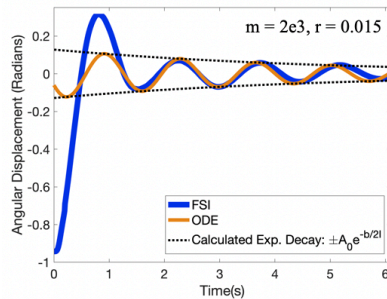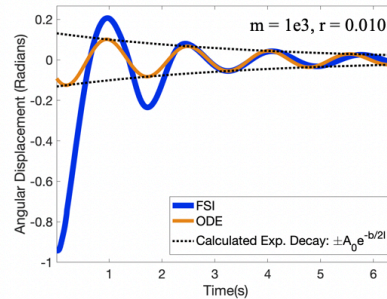

**Note:**

- Reduced-order ODE model shows qualitative agreement after a few swings
- The first few swings there is not agreement due to *limitations of the damping term in the ODE model!*
- The damping term is unable to capture any enhanced drag due to the fluid
- So, *Stokes Drag Law works well in the regime in which it's supposed to!*

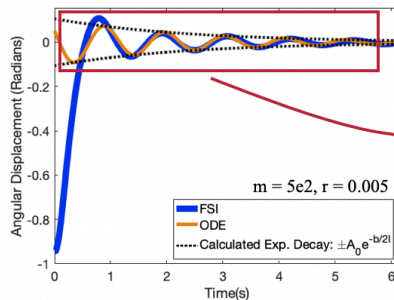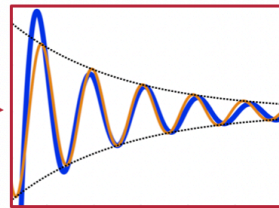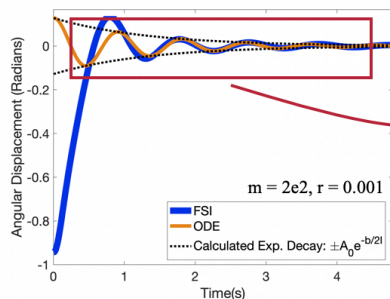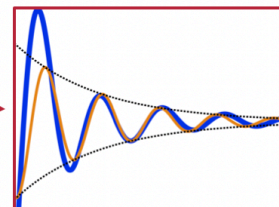

# Comparing: FSI vs. ODE Model



## Finding damping parameter (as function of mass and radius)

### Plan:

- Find the *effective moment of inertia*:

$$I = \frac{mgL}{\frac{4\pi^2}{T_D^2} + \gamma^2}$$

- Using *exponential decay* from fits, compute

$$b = -2\gamma I$$

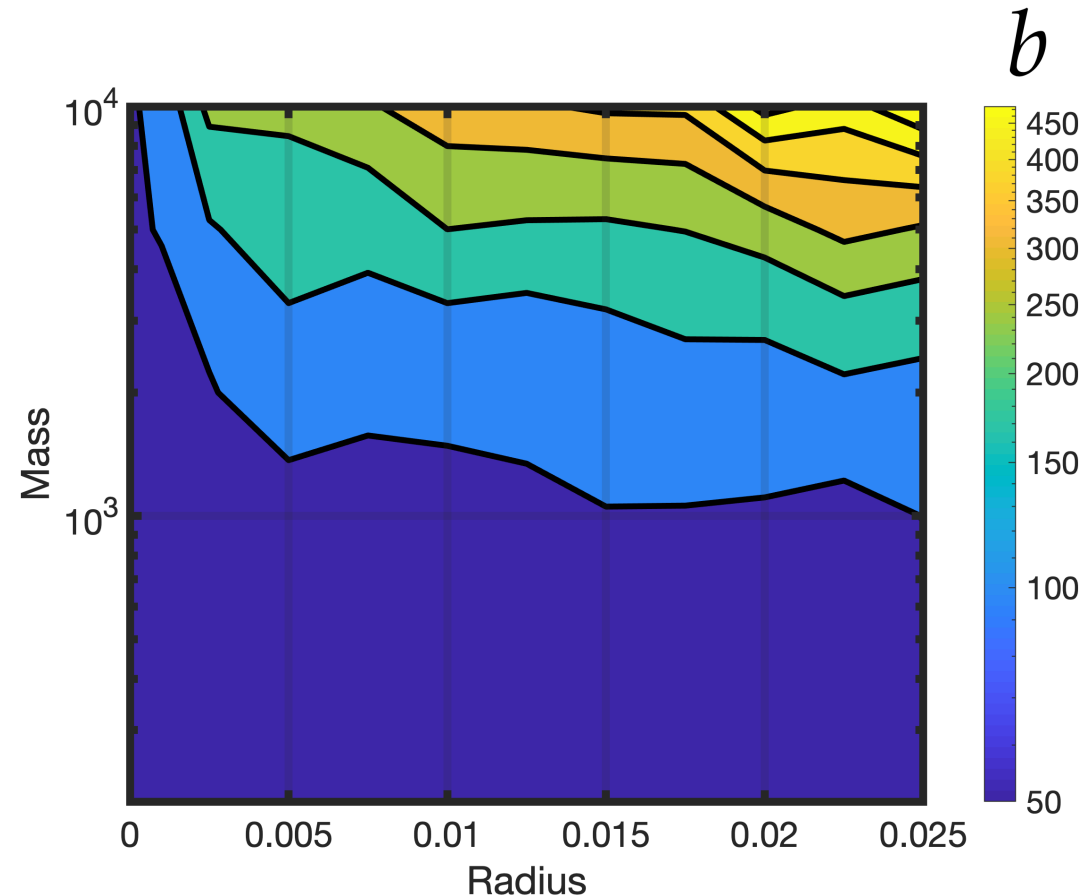

# Comparing: FSI vs. ODE Model



## Danger!

*What if you don't start the ODE Model at the amplitude of the FSI model after a few swings...*

**Note:**

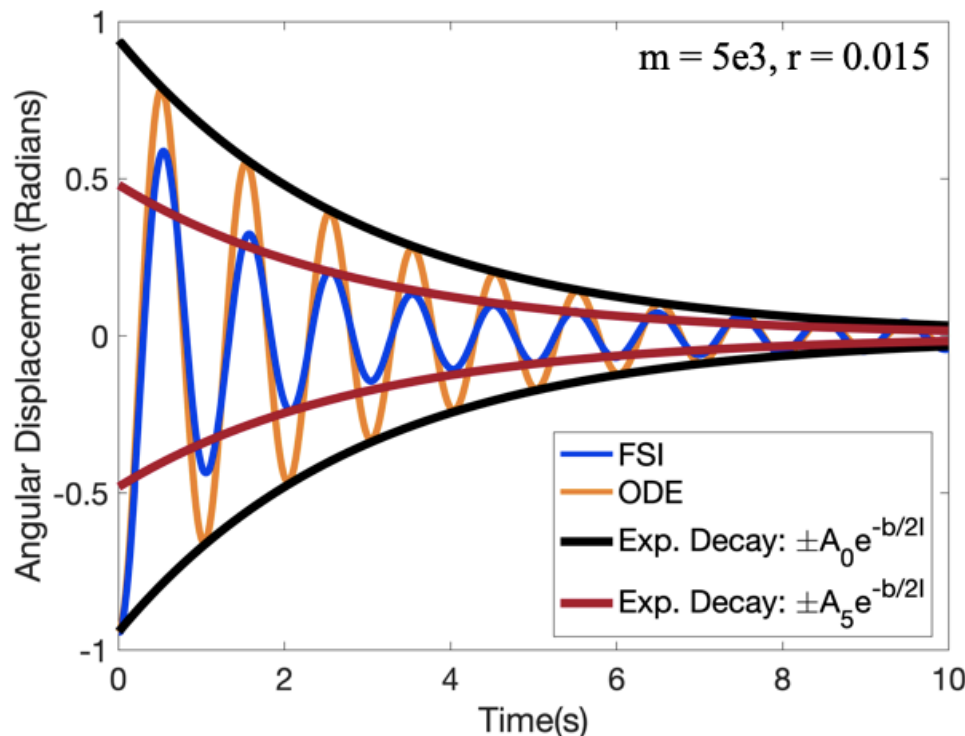

- ODE model solution found by propagating solution *starting at time  $t=0$  with same initial displacement of FSI model*
- Exponential decay plotted in two ways: same as before starting around 5<sup>th</sup> peak amplitude, and starting at  $t=0$ .
- **Does not show agreement with FSI model!**
- FSI model illustrates enhanced drag during the first few swings - the ODE model cannot reconcile FSI dynamics even with exponential decay fit!

# Pendulums

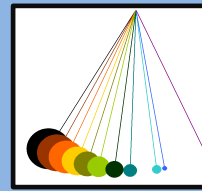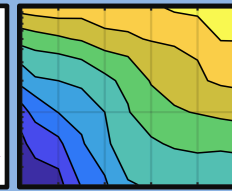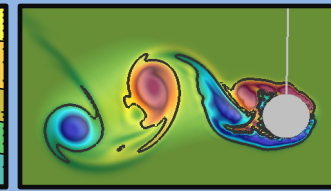

**Pendulum Summary...**

# Pendulums



## Some Takeaways:

- The fluid-structure interaction (FSI) and reduced-order ODE model agree after a few swings of the pendulum
- ***ODE model cannot provide details about the underlying fluid dynamics, but the FSI model certainly can!***
- The ***FSI model unveiled*** some of the ***hidden complex dynamics*** within the fluid system, e.g.,
  - Differences in ***vortex dynamics*** (formation and shedding)
  - “***Drafting***” off the backside of the pendulum bob as it swings
- Although an old and historic device, there is ***much more to uncover about pendulums*** and ***CFD Simulations may hold the key!***

# Pendulums

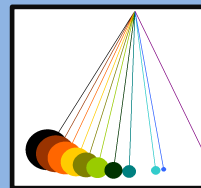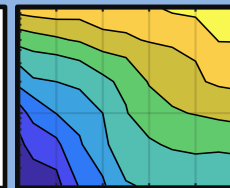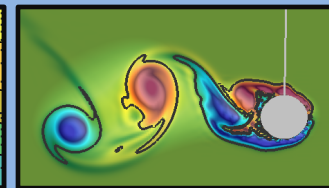

 Search or jump to...

Pull requestsIssuesMarketplaceExplore





is nerdin' out!

**Nick Battista**  
nickabattista

Edit profile

Asst. Math. Prof. at TCNJ, interested in FSI, numerical PDE, mathematical biology, physiology, and educational tools/software.  
 TCNJ  
 Ewing, NJ  
 [nickabattista@gmail.com](mailto:nickabattista@gmail.com)  
 <http://battistn.pages.tcnj.edu>

OverviewRepositories 13Projects 0Packages 0Stars 15Followers 58Following 47

Pinned

Customize your pins

**IB2d**

An easy to use immersed boundary method in 2D, with full implementations in MATLAB and Python that contains over 60 built-in examples, including multiple options for fiber-structure models and adve...

 38 30

**Ark**

An array of codes used for teaching various aspects of numerical analysis, covering Interpolation, Quadrature, basic ODE solves and Spectral solvers, as well as Monte Carlo methods.

 1

**Holy\_Grail**

An array of fluid solver codes, including Projection, Pseudo-Spectral (FFT), Lattice Boltzmann, and the Panel Method with implementations in both MATLAB and Python3

 8 9

**Peacocks\_Eye**

Books, notes, and mathematical/scientific writings in progress.

 Mathematica

**Sankara\_Stones**

An array of codes for solving nonlinear elliptic PDEs and advection-diffusion equations using Chebyshev pseudo-spectral methods.

 3

**Grail\_Tablet**

MATLAB and Python 3.5 scripts for printing data (points, scalar, vector, etc) to VTK formats



Open Source Codes Available: [github.com/nickabattista](https://github.com/nickabattista)
